1 **Collective interactions augment influenza A virus replication in a host-dependent manner**

2

3 Kara L. Phipps<sup>a</sup>, Ketaki Ganti<sup>a</sup>, Silvia Carnaccini<sup>b</sup>, Miglena Manandhar<sup>c</sup>, Nathan T. Jacobs<sup>a</sup>,  
4 Brett E. Pickett<sup>c</sup>, Gene S. Tan<sup>c,d,f</sup>, Lucas M. Ferreri<sup>b</sup>, Daniel R. Perez<sup>b,e</sup> and Anice C. Lowen<sup>a,d\*</sup>

5

6 <sup>a</sup>Department of Microbiology and Immunology, Emory University School of Medicine, Atlanta,  
7 Georgia, United States of America

8 <sup>b</sup>Department of Population Health, Poultry Diagnostic and Research Center, University of  
9 Georgia, Athens, Georgia, United States of America.

10 <sup>c</sup>J. Craig Venter Institute, La Jolla, California, United States of America

11 <sup>d</sup>Emory-UGA Center of Excellence for Influenza Research and Surveillance (CEIRS), Atlanta,  
12 Georgia, United States of America

13 <sup>e</sup>Center of Research on Influenza Pathogenesis (CRIP) CEIRS, New York, New York, United  
14 States of America.

15 <sup>f</sup>Division of Infectious Disease, Department of Medicine, University of California San Diego, La  
16 Jolla, CA, United States of America

17

18 \*Address correspondence: [anice.lowen@emory.edu](mailto:anice.lowen@emory.edu)

19

20 **Abstract**

21 Infection with a single influenza A virus (IAV) is only rarely sufficient to initiate productive  
22 infection. Here, we exploit both single-cell approaches and whole-animal systems to show that  
23 the extent of IAV reliance on multiple infection varies with virus strain and host species.  
24 Influenza A/guinea fowl/HK/WF10/99 (H9N2) [GFHK99] virus exhibits strong dependence on  
25 collective interactions in mammalian systems. This reliance focuses viral progeny production  
26 within coinfecting cells and therefore results in frequent genetic exchange through reassortment.  
27 In contrast, GFHK99 virus has greatly reduced dependence on multiple infection in avian  
28 systems, indicating a role for host factors in viral collective interactions. Genetic mapping  
29 implicated the viral polymerase as a major driver of multiple infection dependence.  
30 Mechanistically, quantification of incomplete viral genomes showed that their complementation  
31 only partly accounts for the observed reliance on coinfection. Indeed, even when all polymerase  
32 components are detected in single-cell mRNA sequencing, robust polymerase activity of  
33 GFHK99 virus in mammalian cells is reliant on multiple infection. In sum, IAV collective  
34 interactions not only augment reassortment, but can also overcome species-specific barriers to  
35 infection. These findings underscore the importance of virus-virus interactions in IAV infection,  
36 evolution and emergence.

37

## 38 Introduction

39 Classically, an infectious unit has been defined as a single virus particle which delivers its  
40 genome to a cell, initiates the viral reproductive program, and yields progeny viruses.  
41 Increasingly, however, the importance to infection of collective interactions among viruses is  
42 being recognized<sup>1-3</sup>. The delivery of multiple virus genomes to a cell allows both antagonistic  
43 and mutually beneficial interactions to occur, and these interactions in turn have the potential to  
44 shape transmission, pathogenicity, and viral evolutionary pathways.

45 Recent work has revealed several distinct mechanisms by which multiple viral genomes  
46 are co-delivered to a target cell. Diverse taxa including enterovirus, norovirus and rotavirus have  
47 all been observed to emerge from cells as groups of particles clustered within extracellular  
48 vesicles<sup>4,5</sup>. Adhesion of virus particles to bacterial cell surfaces has a similar clustering effect  
49 and increases coinfection of target cells by poliovirus<sup>6</sup>. The aggregation of free virions was  
50 found to yield multi-particle infectious units in the case of vesicular stomatitis virus (VSV)<sup>7,8</sup>.  
51 Various mechanisms of direct cell-to-cell spread also serve to deliver multiple viral genomes to  
52 the same cell<sup>9-11</sup>. The implications of multiple infection in these diverse systems are still being  
53 explored. In a number of cases, however, collective delivery was demonstrated to increase the  
54 efficiency of infection relative to free virus particles<sup>4,5</sup>, or to increase the rate of genetic  
55 exchange through recombination<sup>6</sup>.

56 Whether brought about through coordinated infection with physically-linked virions or  
57 through independent infection events, the presence of multiple viral genomes within a cell  
58 creates the potential for their interaction to alter the course of infection. When distinct variants  
59 coinfect, mutually beneficial effects, such as reciprocal compensation for deleterious mutations,  
60 can increase overall fitness<sup>12-14</sup>. In the case of IAV, several lines of evidence point to a major  
61 role in infection for multiplicity reactivation, the process by which segmented genomes lacking  
62 one or more functional segments complement each other<sup>15-19</sup>. Conversely, negative interactions  
63 can also arise in which deleteriously mutated genes act in a dominant negative fashion.

64 Defective interfering particles, which often potently interfere with the production of infectious  
65 progeny from a coinfecting cell, are the most extreme example of such antagonism<sup>20-22</sup>.

66 Importantly, multiple infection with identical viral genomes can also alter infection  
67 outcomes. Such cooperation was documented for VSV and HIV, where rates of transcription  
68 and replication were enhanced with increasing multiplicity of infection (MOI)<sup>23,24</sup>. Similarly, faster  
69 kinetics of virus production were seen at high MOI for poliovirus and an H3N2 subtype IAV<sup>19,25</sup>.  
70 In these instances, it is thought that increased copy number of infecting viral genomes provides  
71 a kinetic benefit important in the race to establish infection before innate antiviral responses  
72 take hold. Indeed, it has been suggested that multiple infection may be particularly relevant for  
73 facilitating viral growth under adverse conditions, such as antiviral drug treatment<sup>3,26</sup>.

74 For IAV, an important adverse condition to consider is that of a novel host environment.  
75 IAVs occupy a broad host range, including multiple species of wild waterfowl, poultry, swine,  
76 humans and other mammals<sup>27,28</sup>. Host barriers to infection typically confine a given lineage to  
77 circulation in one species or a small number of related species<sup>29,30</sup>. Spillovers occur  
78 occasionally, however, and can seed novel lineages. When a novel IAV lineage is established in  
79 humans, the result is a pandemic of major public health consequence<sup>31,32</sup>. The likelihood of  
80 successful cross-species transfer of IAV is determined largely by the presence, absence, and  
81 compatibility of host factors on which the virus relies to complete its life cycle, and on the  
82 viruses' ability to overcome antiviral defenses in the novel host<sup>33-35</sup>.

83 Owing to the segmented nature of the IAV genome, multiple infection results in viral  
84 genetic exchange through reassortment<sup>36,37</sup>. If coinfecting viral genomes are distinct,  
85 reassortment will yield genotypic diversity that may facilitate evolution, including adaptation to a  
86 new host<sup>38</sup>. Indeed, reassortment involving human seasonal viruses and IAV adapted to non-  
87 human hosts was central to the emergence of the last three pandemic strains<sup>39,40</sup>. Thus, among  
88 the interactions that occur between coinfecting viruses, reassortment is critical to consider for  
89 IAV.

90 Our objective herein was to assess the degree to which IAV relies on the delivery of  
91 multiple viral genomes to a cell to ensure production of progeny. In particular, we sought to  
92 determine whether this phenotype varies with host species and with virus strain. We therefore  
93 examined multiplicity dependence in avian and mammalian cells for two highly divergent avian-  
94 origin IAVs, influenza A/mallard/Minnesota/199106/99 (H3N8) [MaMN99] virus and influenza  
95 A/guinea fowl/Hong Kong/WF10/99 (H9N2) [GFHK99] virus. While MaMN99 virus is typical of  
96 IAV commonly isolated from wild ducks, GFHK99 virus is representative of the G1 lineage of  
97 H9N2 viruses prevalent in the poultry of Southeast Asia, Middle East, and North Africa<sup>41,42</sup>.  
98 Results from all virus/cell combinations tested confirm prior reports that cells multiply-infected  
99 with IAV produce more viral progeny than singly-infected cells. Importantly, however, the  
100 proportion of viral progeny that emerge from coinfecting cells varies greatly with virus-host  
101 context. The GFHK99 strain exhibits an acute dependence on multiple infection in mammalian  
102 cells that is not seen for MaMN99 virus in mammalian cells or for GFHK99 virus in avian cells.  
103 The polymerase of the GFHK99 virus drives its host-specific dependence on multiple infection.  
104 In line with this finding, both bulk and single-cell measurements of viral RNA showed that  
105 polymerase activity in mammalian cells is enhanced with multiple infection. A need for  
106 complementation of incomplete viral genomes partially accounts for this cooperative effect.  
107 Importantly, however, single cell data indicate that additional multiplicity-dependent mechanisms  
108 support RNA synthesis by the GFHK99 virus in mammalian cells. Thus, our data point to an  
109 important role for multiple infection in determining the potential for IAV replication in diverse  
110 hosts.

111

## 112 **Results**

### 113 ***Virus-host interactions dictate degree of multiplicity dependence***

114 To evaluate the extent to which IAV relies on multiple infection for productive infection, we  
115 initially used coinfection and reassortment as readouts. Reassortment is a useful measure for

116 coinfection dependence because reassortant viruses must arise from coinfecting cells. To  
117 ensure accurate quantification of reassortment, coinfections were performed under single-cycle  
118 conditions with homologous viruses that differ only by a silent mutation in each segment and the  
119 presence of either an HA or HIS epitope tag fused to the HA protein. Such homologous virus  
120 pairings were generated in both MaMN99 and GFHK99 strain backgrounds and were named  
121 MaMN99 WT / MaMN99 VAR and GFHK99 WT / GFHK99 VAR<sub>1</sub>. Tracking of HA and HIS  
122 expression by flow cytometry provides a measure of infection that can be compared across cell  
123 lines. Quantification of cells expressing one or both epitope tags furthermore gives a means of  
124 assessing levels of coinfection across a range of MOIs.

125 Coinfection and reassortment between homologous viruses of the MaMN99 or GFHK99  
126 strain backgrounds were examined in Madin-Darby canine kidney (MDCK), chicken DF-1 and  
127 human A549 cells (**Figure 1, Supplementary Figure 1**). Analysis of MDCK cells infected with  
128 the GFHK99 viruses at MOIs ranging from 10 to 0.01 PFU per cell revealed a near linear  
129 relationship between total HA<sup>+</sup> cells and dual-HA<sup>+</sup> cells, suggesting that the GFHK99 strain is  
130 strictly dependent on multiple infection for HA expression in these cells (**Figure 1A**). HA  
131 production resulting from infection with a single strain was more common for GFHK99 in DF-1  
132 cells or MaMN99 in MDCK cells, indicating a lesser dependence on multiple infection (**Figure**  
133 **1A**). The more dependent expression of *any* HA protein is on coinfection, the more linear the  
134 relationship between the percentages of dual-HA<sup>+</sup> cells and HA<sup>+</sup> cells becomes. Conversely, a  
135 more quadratic relationship indicates less dependence on coinfection, as individual particles are  
136 more often able to express HA independently. We therefore quantified the degree of linearity  
137 from the regression models of each dataset and found that only GFHK99 virus in MDCK cells  
138 exhibits appreciable linearity in the relationship between HA<sup>+</sup> and dual-HA<sup>+</sup> cells (**Figure 1B**).

139 Genotyping of progeny virus from coinfections similarly revealed that reassortment levels  
140 vary by virus strain and cell type. In line with observed levels of coinfection, GFHK99 virus  
141 exhibits high levels of reassortment in MDCK cells even at low MOIs, indicating that nearly all

142 progeny virus is produced from WT-VAR<sub>1</sub> coinfecting cells (**Figure 1C**). GFHK99 coinfection in  
143 A549 cells is also characterized by high levels of reassortment, although less extreme than  
144 those seen in MDCK cells (**Supplementary Figure 1**). Compared to GFHK99, MaMN99 viruses  
145 infecting MDCK cells show lower levels of reassortment (**Figure 1C**). Moreover, reassortment of  
146 GFHK99 viruses is markedly reduced in DF-1 cells compared to that seen in MDCK cells  
147 (**Figure 1D**). These results clearly reveal differing degrees of multiplicity dependence for  
148 different virus/cell pairings and therefore indicate that multiple infection dependence, rather than  
149 solely being an intrinsic property of a virus strain, is determined through virus-host interactions.

150 That all virus/cell pairings tested show evidence of multiplicity dependence is highlighted  
151 by comparison of the experimental reassortment data to a theoretical prediction that assumes  
152 infection is perfectly efficient (**Figure 1C, 1D**). This theoretical prediction was published  
153 previously<sup>18</sup> and is derived from a computational model in which the number of viral progeny  
154 produced by an infected cell is constant. Because singly- and multiply-infected cells make  
155 equivalent numbers progeny, reassortment is predicted to increase only gradually at low levels  
156 of infection (low %HA+) where coinfection is relatively rare. By contrast, reassortment observed  
157 experimentally reaches high levels much more rapidly. High reassortment indicates that viral  
158 progeny production is focused in the proportion of the infected cell population that is multiply  
159 infected. Coinfection dependence, therefore, is evident in all virus-cell pairings, but particularly  
160 strong for GFHK99 in MDCK cells.

161

### 162 ***Strain and host specific phenotypes are also evident in vivo***

163 To determine whether host-dependent reliance on multiple infection extended to *in vivo*  
164 infection, we performed coinfections with MaMN99 WT and VAR viruses in guinea pigs and  
165 GFHK99 WT and VAR<sub>1</sub> viruses in guinea pigs and quail. To ensure use of comparable effective  
166 doses for each virus/host pairing, the 50% infectious dose (ID<sub>50</sub>) of each virus mixture was first  
167 determined experimentally in the animal models used. Guinea pigs were then infected

168 intranasally with  $10^2$  GPID<sub>50</sub> of either the GFHK99 or MaMN99 WT/VAR mixture and nasal  
169 washes were collected daily. Japanese quail were infected with  $10^2$  QID<sub>50</sub> of the GFHK99 virus  
170 mixture via an oculo-naso-tracheal route and tracheal swabs were collected daily. To evaluate  
171 the frequency of reassortment, plaque isolates from these upper respiratory samples were  
172 genotyped for each animal on each day. Because multicycle replication *in vivo* allows the  
173 propagation of reassortants, analysis of genotypic diversity rather than percent reassortment is  
174 more informative for these experiments. Thus, the effective diversity (Hill's  $N_2$ ) was calculated  
175 for each dataset and plotted as a function of time post-inoculation (**Figure 1E, 1F**). The viruses  
176 collected from GFHK99 infected guinea pigs show much higher genotypic diversity throughout  
177 the course of infection than viruses isolated from MaMN99 infected guinea pigs (**Figure 1E**) or  
178 GFHK99 infected quail (**Figure 1F**). These data indicate that the virus-host interactions which  
179 determine dependence on multiple infection in cell culture extend to *in vivo* infection.

180

### 181 ***Multiple infection enhances viral growth***

182 The abundant reassortment observed with GFHK99 viruses in mammalian systems suggests  
183 that multiple infection plays a major role in determining the productivity of an infected cell. We  
184 therefore hypothesized that increasing MOI would augment the burst size, or viral output, of  
185 infected cells and that the magnitude of this effect would be greater for GFHK99 in MDCK cells  
186 than for GFHK99 in DF-1 cells or MaMN99 in MDCK cells. To test this prediction, we infected  
187 over a range of MOIs with the same mixtures of GFHK99 WT and VAR<sub>1</sub> or MaMN99 WT and  
188 VAR viruses used above and then measured PFU produced per cell under single-cycle  
189 conditions. Under non-saturating conditions (determined by flow cytometry to be MOI <1 PFU  
190 per cell, as shown in **Supplementary Figure 2**), increasing MOI resulted in accelerated viral  
191 growth and higher burst size for all three virus/cell pairings (**Figure 2A-C**). As predicted,  
192 however, increasing the MOI of GFHK99 in MDCK cells resulted in a further enhancement of



193 viral amplification (**Figure 2D**). Thus, the benefit conferred by multiple infection was greater for  
194 GFHK99 in MDCK cells compared to either MaMN99 in MDCK cells or GFHK99 in DF-1 cells.

195 We reasoned that the cooperative effect observed might result from i) complementation  
196 of incomplete viral genomes or ii) a benefit of increased viral genome copy number per cell. In  
197 an effort to differentiate between these possibilities, we measured growth of GFHK99 in MDCK  
198 and DF-1 cells infected at a range of MOIs greater than 1 PFU per cell. Because these  
199 conditions are saturating (**Supplementary Figure 2**), incomplete viral genomes are unlikely to  
200 be prevalent and any benefit of increasing MOI would be attributable to increasing genome copy  
201 numbers per cell. In both cell types, MOIs between 1 and 20 PFU per cell result in similar peak  
202 viral titers (**Figure 2E-F**). This saturation of cooperation at higher MOIs suggests diminishing  
203 returns from additional genome copies above a certain threshold. Calculation of fold change in  
204 viral amplification revealed that burst size was either unchanged or negatively affected by  
205 increasing MOI above 1 PFU per cell (**Figure 2G**). Whether this threshold is imposed by a need  
206 for complementation or another mechanism sensitive to saturation remained unclear. Overall,  
207 however, the increase in viral amplification with increased multiplicity at sub-saturating MOIs  
208 strengthened our prior conclusion that viral growth, and particularly productivity of GFHK99 virus  
209 in MDCK cells, is enhanced by multiple infection.

210

### 211 ***The viral polymerase is a major determinant of multiple infection dependence***

212 To identify viral genetic determinants of multiple infection dependence, we mapped segments  
213 responsible for the high reassortment phenotype of GFHK99 in MDCK cells. Reverse genetics  
214 was used to place one or more genes from GFHK99 into a MaMN99 background. We created a  
215 panel of chimeras containing the HA, NP, or the full polymerase complex and NP (3PNP) of  
216 GFHK99 virus in the MaMN99 background. We also generated the reciprocal swap of this last  
217 genotype in which NS, M, NA and HA segments were derived from GFHK99. These segment  
218 groupings were selected for exchange based on their functions in the viral life cycle. For each

219 chimeric genotype, homologous WT and VAR strains were generated to allow tracking of  
220 homologous reassortment.

221       Coinfections with matched WT and VAR strains were performed in MDCK cells and HA  
222 expression and reassortment were measured as in **Figure 1**. When levels of dual HA positivity  
223 are assessed, most MaMN99:GFHK99 chimeric genotypes cluster together with the parental  
224 MaMN99 virus, suggesting a relatively low dependence on multiple infection for HA expression  
225 (**Figure 3A-B**). By contrast, the MaMN99:GFHK99 3PNP genotype gives results similar to those  
226 of the parental GFHK99 (**Figure 3A-B**). Quantification of reassortment revealed that all chimeric  
227 viruses reassort at a higher frequency than MaMN99 parental strains but that the  
228 MaMN99:GFHK99 3PNP viruses show the highest reassortment, comparable to that seen for  
229 the parental GFHK99 genotype (**Figure 3C-D**). Thus, while other viral genes may make minor  
230 contributions, the viral polymerase is the primary genetic determinant of the high reassortment  
231 exhibited by GFHK99 in MDCK cells and defines a need for cooperation between coinfecting  
232 viruses.

233

### 234 ***Multiple infection enhances viral RNA replication***

235 Because genetic mapping of the GFHK99 high reassortment phenotype implicated the viral  
236 polymerase, we sought to ascertain the effects of multiple infection on polymerase function. We  
237 therefore measured GFHK99 WT viral RNA synthesis in the absence and presence of  
238 increasing amounts of a homologous coinfecting virus. To evaluate host specificity, we did this  
239 analysis in both MDCK and DF-1 cells. The coinfecting virus, GFHK99 VAR<sub>2</sub>, was generated in  
240 the GFHK99 background to avoid genetic incompatibility and carries silent mutations in each  
241 segment that disrupt primer binding sites. Cells were infected with low MOI (0.005 PFU per cell)  
242 of GFHK99 WT virus to ensure receipt of a single copy of the virus genome. Concurrently, cells  
243 were infected with increasing doses of GFHK99 VAR<sub>2</sub> virus. Digital droplet PCR (ddPCR) with  
244 primers specific for GFHK99 WT cDNA was then used to quantify replication of WT genomes.

245 The results show that, in both cell types, coinfection with low to moderate doses of the VAR<sub>2</sub>  
246 virus increases levels of GFHK99 WT vRNA (**Figure 4A**). At the highest doses of VAR<sub>2</sub> virus  
247 used, however, a suppressive effect is observed. Importantly, the amount of coinfection required  
248 to reach maximal vRNA production differs among cell lines: in MDCK cells 10-fold more VAR<sub>2</sub>  
249 virus (1 PFU per cell) is needed than in DF-1 cells (0.1 PFU per cell). The maximal impact of  
250 VAR<sub>2</sub> virus on WT vRNA production is also greater in MDCK cells: a ~60-fold enhancement is  
251 seen, compared to only ~2-fold in DF-1 cells.

252 To verify these observations in a more physiologically relevant system, we repeated the  
253 experiment in primary human tracheobronchial epithelial (HTBE) cells differentiated at an air-  
254 liquid interface. Similar to MDCK cells, these primary human cells exhibit maximal GFHK99 WT  
255 RNA production with addition of 1 PFU per cell GFHK99 VAR<sub>2</sub> virus (**Figure 4B**). Peak RNA  
256 replication is >10 fold higher in HTBE cells than without coinfecting virus.

257 Thus, in all three cell types tested, the introduction of coinfecting VAR<sub>2</sub> virus reveals a  
258 cooperative effect acting at the level of RNA synthesis. At very high doses of VAR<sub>2</sub> virus, WT  
259 RNA levels decline, suggesting competition for a limited resource at these extreme MOIs. Most  
260 notably, the magnitude of the cooperative effect and the amount of VAR<sub>2</sub> virus needed to reach  
261 maximal WT RNA levels are much greater in mammalian cells than avian cells. These differing  
262 outcomes indicate that the multiplicity dependence of GFHK99 polymerase function is  
263 modulated by host factors that differ between mammalian and avian hosts.

264

### 265 ***Multiple infection accelerates viral replication and transcription***

266 To more finely assess the effects of multiplicity on polymerase function in various virus-host  
267 combinations, we measured vRNA, mRNA, and cRNA over time following low or high MOI  
268 infection (**Figure 5A**). MaMN99 and GFHK99 viruses were examined in MDCK cells and  
269 GFHK99 virus in DF-1 cells. To evaluate the activity of the viral polymerase when the encoding  
270 genes are supplied as low or single copies, a dose of 0.5 RNA copies per cell was used for

271 infection. Under these low MOI conditions, all three viral RNA species accumulate at a  
272 significantly higher rate for GFHK99 in DF-1 cells and MaMN99 in MDCK cells than for GFHK99  
273 in MDCK cells (**Figure 5B**). In defining a high MOI dose, we elected to use HA expressing units,  
274 as determined by flow cytometry, rather than genome copy number (**Supplementary Figure 3**).  
275 This measure gives a functional readout for polymerase activity, and therefore allows a dose to  
276 be chosen that ensures the vast majority of cells carry an active viral polymerase. The high MOI  
277 dose used was 3.0 HA expressing units per cell. At this high MOI, accumulation of GFHK99  
278 mRNA, vRNA and cRNA in MDCK cells occurs at a similar rate to that seen for GFHK99 in DF-1  
279 cells or MaMN99 in MDCK cells (**Figure 5C**). Thus, a host-specific defect in GFHK99  
280 polymerase activity that affects synthesis of all three viral RNA species is seen at low MOI. This  
281 defect is, however, resolved under conditions where multiple infection is prevalent.

282

### 283 ***Single cell mRNA sequencing reveals a need for cooperation beyond complementation***

284 An important limitation of working with bulk RNA extracted from a population of cells is the  
285 inability to distinguish between i) low, but uniform, RNA synthesis in all cells and ii) robust RNA  
286 synthesis in only a minority of cells. To elucidate the basis for cooperation at higher MOIs, it was  
287 important to determine which of these scenarios gives rise to the low average viral RNA levels  
288 that characterize low MOI infection with GFHK99 in MDCK cells. A highly heterogeneous  
289 picture, with abundant viral RNAs in a minority of cells, would be expected if incomplete viral  
290 genomes are common but cells with a complete set of polymerase genes support robust viral  
291 RNA synthesis. Conversely, uniformly low levels of viral products would be expected if even  
292 complete viral genomes cannot support robust polymerase activity in the context of singular  
293 infection.

294 To evaluate the heterogeneity of viral RNA synthesis at the single cell level, we used  
295 single-cell mRNA sequencing. We infected DF-1 or MDCK cells with GFHK99 virus under  
296 single-cycle conditions and collected cells at 8 h post-infection for mRNA barcoding on the 10X

297 Genomics Chromium platform prior to sequencing. The relative abundance of mRNA from each  
298 viral transcript was calculated by normalizing to the median number of transcripts per cell in that  
299 infection. Cells in which at least one viral mRNA molecule was detected were analyzed further.  
300 The number of cells that met this criterion ranged between 182 and 478 per infection condition  
301 (MOI and cell type combination). We found that the amount of detected GFHK99 viral mRNA  
302 varies widely between individual DF-1 cells (**Figure 6A**), which is consistent with previous  
303 observations<sup>43</sup>. In contrast, GFHK99 viral mRNA levels are uniformly low in MDCK cells under  
304 the relatively low MOI conditions used.

305 Because only subset of a cell's transcripts is captured and therefore reliably detected<sup>44</sup>,  
306 the 10X platform does not allow a robust determination of segment presence or absence in a  
307 cell. Where viral mRNAs derived from a given segment are detected, however, one can  
308 conclude that the corresponding vRNA was present. To evaluate whether low transcript  
309 abundance corresponded to the lack of one or more polymerase-encoding segments, we  
310 therefore stratified the data based on detection of all four segments necessary to support  
311 transcription (PB2, PB1, PA and NP) (**Figure 6A**). Viral transcript levels are markedly increased  
312 in DF-1 cells that contained the PB2, PB1, PA, and NP segments compared to those in which  
313 one or more of these segments was not detected. Averaging across all MOIs, a 10-fold increase  
314 in transcript abundance was noted in DF-1 cells ( $p < 10^{-16}$ , linear mixed effects model). In  
315 contrast, viral transcription in MDCK cells is consistently low, and the presence of polymerase  
316 complex confers no benefit (**Figure 6A**).

317 Data presented above from bulk samples indicate that multiple infection is needed for  
318 efficient GFHK99 transcription in MDCK cells. To measure the impact of coinfecting virus in  
319 individual cells, we repeated the single-cell sequencing experiment with the addition of  
320 genetically marked variants of GFHK99 virus. For an mRNA sequencing assay, marker  
321 mutations proximal to the poly-A tail of the viral transcripts are needed; we therefore generated  
322 variant viruses that carry synonymous nucleotide changes near the 5' end of each vRNA,

323 GFHK99 mVAR<sub>1</sub> and GFHK99 mVAR<sub>2</sub>. Cells were inoculated with GFHK99 WT and GFHK99  
324 mVAR<sub>1</sub> viruses in a 1:1 ratio and the combined MOI was the same as that used for GFHK99 WT  
325 in the first experiment. Coinfection with GFHK99 mVAR<sub>2</sub> virus was performed simultaneously  
326 and this virus was used at the concentration found to be optimal for WT viral RNA replication in  
327 **Figure 4A**; the MOI therefore differed between DF-1 (0.1 PFU per cell) and MDCK (1.0 PFU per  
328 cell) cells. After mRNA sequencing, cells in which transcripts from all eight mVAR<sub>2</sub> virus  
329 segments were detected were analyzed further. Between 131 and 240 cells per infection  
330 condition (MOI, cell type, virus strain) met this criterion. The viral transcript levels per cell  
331 detected in this second experiment are shown in **Figure 6B** alongside data from the first  
332 experiment for comparison. In this figure, GFHK99 WT and GFHK99 mVAR<sub>1</sub> mRNAs are plotted  
333 separately; the concordance between these two datasets gives an indicator of reproducibility. In  
334 comparing the two infections, we observe that total viral transcript abundance is 72% lower in  
335 MDCK cells compared to DF-1 cells in the first infection ( $p < 10^{-16}$ , linear mixed effects model),  
336 but this effect is almost entirely mitigated by the presence of mVAR<sub>2</sub> virus, as transcript  
337 abundance is reduced by only 11% in MDCK cells in the second infection ( $p < 10^{-16}$ , linear  
338 mixed effects model). This reduction in the disparity between DF-1 and MDCK cell viral  
339 transcript abundance resulted from the fact that mVAR<sub>2</sub> virus increased transcript abundance by  
340 102% in DF-1 cells, but 545% in MDCK cells ( $p < 10^{-16}$ , linear mixed effects model) (**Figure**  
341 **6B**). These data underscore the significance of viral collective interaction to ensure productive  
342 infection in diverse hosts.

343

#### 344 ***Frequency of incomplete GFHK99 genomes in MDCK cells is moderate***

345 Our single-cell sequencing results suggest that the presence of a complete viral genome in the  
346 infected cell is not sufficient to support robust transcription of GFHK99 vRNAs. All eight viral  
347 gene segments are, however, necessary for productive infection<sup>45</sup> and could play an important  
348 role in the reliance of GFHK99 virus on multiple infection in mammalian systems. We therefore

349 sought to quantify the frequency with which fewer than eight vRNAs are replicated in GFHK99  
350 infected MDCK cells. Given the sensitivity limitations of the single-cell mRNA sequencing  
351 method, we employed a single-cell assay that we designed previously for this purpose<sup>19</sup>. MDCK  
352 cells were coinfecting with a low MOI of GFHK99 WT virus and a high MOI of GFHK99 VAR<sub>2</sub>  
353 virus. The GFHK99 VAR<sub>2</sub> virus acts to ensure propagation of the WT virus gene segments,  
354 even when less than the full WT viral genome is available for transcription and replication.  
355 Following inoculation, single cells were sorted into wells which contain a naïve cell monolayer  
356 and multicycle replication was allowed for 48 h. To determine which viral gene segments were  
357 present in the initially sorted cell, RT-qPCR with primers that differentiate WT and VAR<sub>2</sub> gene  
358 segments was applied. As detailed in the Methods, the frequencies of VAR<sub>2</sub> virus infection, WT  
359 virus infection, and each distinct WT segment were used to estimate the probability that a cell  
360 infected with a single WT virus would contain a given segment. We termed the resultant  
361 parameter Probability Present ( $P_P$ ). The experimentally determined  $P_P$  values vary among the  
362 segments, with a range of 0.57 to 0.88 (**Figure 7A**). The product of the eight  $P_P$  values gives an  
363 estimate of the proportion of singular infections in which all eight segments are available for  
364 replication. This estimate is 6.5% for GFHK99 in MDCK cells.

365 The high reassortment of GFHK99 WT and VAR<sub>1</sub> viruses in MDCK cells indicates that  
366 progeny viruses predominantly originate from multiply infected cells in this system. To evaluate  
367 whether incomplete viral genomes account for this focusing of GFHK99 virus production within  
368 multiply infected cells, we used our previously published computational model of IAV coinfection  
369 and reassortment<sup>18</sup>. In this model, the frequency of segment delivery upon replication is  
370 governed by eight  $P_P$  parameters and an infected cell only produces virus if at least one copy of  
371 all eight segments are present. Importantly, in this model the amount of virus produced from  
372 productively infected cells is constant – there is no additional benefit to multiple infection. When  
373 the eight experimentally determined  $P_P$  values for GFHK99 virus in MDCK cells are used to  
374 parameterize the model, the theoretical prediction of reassortment frequency is much lower than



375 that observed experimentally for GFHK99 WT and VAR<sub>1</sub> viruses in MDCK cells (**Figure 7B**).  
376 This discrepancy indicates that the frequency of missing segments cannot fully account for the  
377 high reassortment seen. Thus, the collective interactions on which the GFHK99 virus relies for  
378 replication in mammalian systems appears to extend beyond complementation. A full viral  
379 genome is necessary, but not sufficient, to support robust replication.

380

## 381 **Discussion**

382 Using small genetic tags and a range of molecular tools for their detection, we investigated the  
383 determinants of and mechanistic basis for IAV multiplicity dependence. Our data reveal that  
384 both viral and host features dictate the degree to which productive IAV infection relies on  
385 cooperation. Thus, multiple infection dependence is a property determined through interaction  
386 between the virus and the infected cell, rather than an intrinsic property of the virus. Differences  
387 between virus strains and host systems in multiple infection dependence lead to phenotypic  
388 differences in the amount of reassortment that occurs upon coinfection. The demonstration of  
389 these reassortment differences in mammalian and avian models points to the relevance of viral  
390 collective interactions for IAV evolution and emergence. Mechanistically, our data indicate that  
391 multiple infection is needed in part for complementation of incomplete viral genomes, but that  
392 such complementation is not sufficient to ensure productive infection in all virus-host systems.  
393 Rather, we see that the GFHK99 polymerase requires a second form of cooperation to support  
394 efficient RNA synthesis in mammalian cells. For this reason, robust infection of GFHK99 virus  
395 in mammalian systems is achieved only in the context of high MOI infection. Thus, the data  
396 presented reveal that infection efficiency and the need for cooperation varies with virus-host  
397 context, and the viral polymerase is a major driver of this phenotype.

398 An important implication of viral genome segmentation is the potential for replication of  
399 incomplete genomes within infected cells<sup>2</sup>. For most segmented viruses of vertebrates, including  
400 IAV, each segment encodes at least one essential gene product and a genome lacking one or



401 more functional segments cannot support the production of progeny viruses. Complementation  
402 is therefore a major class of collective interaction for viruses with segmented genomes, the  
403 relevance of which likely depends on the extent to which delivery and replication of the various  
404 genome segments is coordinated for a given virus species<sup>46</sup>. For IAV, we and others have  
405 demonstrated that, within singly-infected cells, a subset of segments fails to be replicated or  
406 expressed with high frequency<sup>16,19,43</sup>. Specifically, for influenza A/Panama/2007/99 (H3N2) virus  
407 in MDCK cells, we found that delivery of a single viral genome results in replication of all eight  
408 segments only 1.2% of the time<sup>19</sup>. Data reported herein for GFHK99 virus indicate that a  
409 somewhat higher proportion of replicated viral genomes are complete – namely, 6.5%. Thus,  
410 GFHK99 virus is partially dependent on complementation for productive infection in this cell line.  
411 However, the high levels of reassortment seen between GFHK99 WT and VAR<sub>1</sub> viruses in  
412 mammalian cells indicate that additional cooperative interactions are at play. This is made clear  
413 by the discrepancy between observed GFHK99 virus reassortment and the reassortment levels  
414 expected if complementation is the only cooperative effect considered. A necessary but  
415 insufficient role for complete viral genomes is further supported by the results of single cell  
416 mRNA sequencing of GFHK99 virus infected MDCK cells. Here, viral transcripts are produced  
417 at low copy numbers even when all four segments needed to support viral RNA synthesis are  
418 confirmed to be present. This outcome is in contrast to that observed for GFHK99 virus in DF-1  
419 cells and to that reported previously for WSN virus in A549 cells, where the heterogeneity in  
420 viral transcript levels among cells could be attributed in part to the apparent absence of one or  
421 more polymerase complex genes<sup>43</sup>. Notably, however, the restriction of GFHK99 viral  
422 transcription in MDCK cells was largely mitigated by the addition of a homologous coinfecting  
423 virus. These data point to a model in which the presence of not just complete genomes, but  
424 rather multiple copies of the viral genome, are needed to overcome host-specific barriers to  
425 GFHK99 infection in mammalian systems.

426           Insight into the nature of this second cooperative interaction is gleaned from the  
427 observation that the amount of viral RNA produced from a constant input of GFHK99 WT viral  
428 genomes is significantly increased with the addition of a homologous virus that is genetically  
429 tagged to allow independent detection. Because GFHK99 WT virus RNAs can be quantified  
430 separately from the coinfecting VAR<sub>2</sub> virus RNAs, we can conclude that the coinfecting virus  
431 functions in *trans* to support GFHK99 WT virus replication. This interaction is likely to occur at  
432 the protein level, with increased genome copy number supporting the expression of higher  
433 levels of viral polymerase proteins or cofactors. This proposed mechanism is supported by prior  
434 work showing that the IAV polymerase can act in *trans* to propagate temperature sensitive (ts)  
435 variants at non-permissive temperatures<sup>47</sup>.

436           Our data implicate the viral polymerase in defining an acute reliance on cooperation for  
437 efficient viral RNA synthesis and viral progeny production. While our experiments focused on  
438 only two avian IAVs, it is well known that avian-adapted IAV polymerases require adaptive  
439 changes for efficient replication in mammalian cells<sup>33,48,49</sup>. The conformation or composition of  
440 the GFHK99 viral polymerase may lead to defects in transcription or replication due to poor  
441 interactions with mammalian host factors, such as ANP32A<sup>50</sup>. Low functionality of the viral  
442 polymerase complex may furthermore lead to the synthesis of abortive products, such as mini  
443 viral RNAs<sup>51</sup>. Thus, the multiplicity dependence of GFHK99 in mammalian systems may be a  
444 manifestation of poor adaptation of the viral polymerase to the host cell. Importantly, however, it  
445 appears that this lack of adaptation can be at least partially overcome when multiple viral  
446 genomes are delivered to the same cell. While MaMN99 virus is also not adapted to mammalian  
447 systems, it is only distantly related to GFHK99 virus and is representative of viruses that  
448 circulate in a taxonomically and geographically distinct avian population compared to the poultry  
449 hosts of GFHK99 virus. It will be important in future studies to delineate further the IAV lineages  
450 and host contexts in which an acute need for cooperation exists.

451           The clear involvement of the polymerase does not exclude the possibility that other  
452 virus-host interactions may impact the need for cooperation. In fact, reassortment levels  
453 measured for chimeric GFHK99-MaMN99 viruses indicated that other viral components  
454 contribute to the high reassortment phenotype of GFHK99 virus. For example, it has been  
455 postulated that the pH of fusion of HA, which dictates when the viral genome is released from  
456 endosomes, determines the amount of time that viral gene segments are vulnerable to diffusion  
457 or degradation during transit to the nucleus<sup>52</sup>. Because stochastic loss of a subset of gene  
458 segments prior to nuclear import would likely be overcome through multiple infection, HA pH of  
459 fusion may determine the need for cooperation in some virus-host contexts. The contribution of  
460 particular viral proteins to coinfection dependence is relevant for understanding barriers to  
461 zoonotic infection and predicting the likelihood of reassortment following zoonoses.

462           The H9N2 subtype is of particular relevance in the context of zoonotic infection as  
463 viruses of this subtype are highly prevalent at the poultry-human interface, sporadic human  
464 infections have been reported, and H9N2 viruses share several related genes with H5N1 and  
465 H7N9 subtype viruses that have caused hundreds of severe human infections<sup>53-58</sup>. The G1  
466 lineage to which the GFHK99 virus belongs circulates widely in the poultry of Southeast Asia  
467 and North Africa and reassorts frequently with other poultry adapted IAVs<sup>41,42,59,60</sup>. The  
468 prevalence of reassortment suggests that the internal gene segments – which comprise the six  
469 non-HA, non-NA segments – are compatible with other genotypes. Our comparison of  
470 reassortment in guinea pigs and quail furthermore indicates that reassortment could be  
471 particularly prevalent in the context of zoonotic infection of mammals. This phenotype of high  
472 reassortment in mammals is expected to extend to the H5N1 and H7N9 subtype viruses of  
473 public health concern, which carry polymerase genes related to those of the GFHK99 virus<sup>56-58</sup>.  
474 While reassortment is typically deleterious owing to negative epistasis among heterologous  
475 segments<sup>61,62</sup>, a high frequency of reassortment creates greater opportunity for fit genotypes to

476 arise and adapt, and should therefore be considered in assessing the risk of emergence posed  
477 by non-human adapted IAVs.

478 Our work reveals an underappreciated facet of virus-host interactions: the extent to  
479 which IAV relies on cooperation with coinfecting viruses is both strain and host dependent.  
480 Varied phenotypes of multiplicity dependence occurring in different virus-host contexts likely  
481 have important implications for viral fitness and viral evolution. Differences in coinfection  
482 dependence are expected to lead to differences in the viral dose required to establish a new  
483 infection, which in turn has implications for both the likelihood of transmission and the  
484 predominant mode of transmission. For example, transmission among close contacts is  
485 associated with the transfer of higher viral loads<sup>63</sup>. Reliance on cooperation is also expected to  
486 impact the spatial dynamics of viral spread within an individual<sup>19</sup>. For example, long-distance  
487 dispersal of virus within a host is less likely to be productive in a system where the virus is  
488 highly dependent on cooperative interactions<sup>64</sup>. Finally, the features which impact coinfection  
489 dependence are also likely to impact viral evolution by changing how a virus population samples  
490 the available sequence space. As discussed above, multiplicity dependence increases the  
491 opportunity for genetic exchange through reassortment, which may in turn slow the  
492 accumulation of deleterious mutations and allow coupling of advantageous mutations<sup>65</sup>. A need  
493 for cooperation would also be predicted to increase the likelihood that less fit variants are  
494 propagated as a result of phenotypic hiding in coinfecting cells<sup>66-68</sup>. Thus, host and strain  
495 specificity in multiple infection dependence are likely to play an important role in determining the  
496 outcomes of IAV infection and evolution in diverse hosts.

497

## 498 **Acknowledgements**

499 We thank David Stallknecht (University of Georgia) for providing the A/mallard/MN/199106/99  
500 (H3N8) biological isolate. We thank Hui Tao, Shamika Danzy, and Ginger Geiger for technical  
501 assistance. This work was funded in part by NIH R01 AI127799 (to ACL and DRP); NIH/NIAID

502 Centers of Excellence in Influenza Research and Surveillance (CEIRS), contract numbers  
503 HHSN272201400004C (to ACL) and HHSN272201400008C (to DRP). Additional funds were  
504 provided by the Georgia Research Alliance and the Georgia Poultry Federation (to DRP) and  
505 NIH/NIAID Genomic Centers for Infectious Diseases (GCID), Award Number U19AI110819.

506

## 507 **Methods**

### 508 ***Cells***

509 Madin-Darby canine kidney (MDCK) cells, a gift from Peter Palese, Icahn School of Medicine at  
510 Mount Sinai were used in coinfection experiments, growth curves, and dosage experiments with  
511 increasing amounts of GFHK99 VAR<sub>2</sub> virus added. MDCK cells from Daniel Perez at University  
512 of Georgia were used for plaque assays as this variant of the MDCK line was found to yield  
513 more distinct plaques for the GFHK99 strain. Both MDCK cell lines were maintained in minimal  
514 essential medium (MEM; Gibco) supplemented with 10% fetal bovine serum (FBS; Atlanta  
515 Biologicals), penicillin (100 IU), and streptomycin (100 µg per mL) (PS; Corning). A549 cells  
516 (ATCC CCL-185) were maintained in F-12K nutrient mixture with L-glutamine (Corning)  
517 supplemented with 10% FBS and PS. 293T cells (ATCC CRL-3216) and DF-1 cells (ATCC  
518 CRL-12203) were maintained in Dulbecco's minimal essential medium (DMEM; Gibco)  
519 supplemented with 10% FBS and PS. Human tracheobronchial epithelial (HTBE) cells from a  
520 single donor were acquired from Lonza and were amplified and differentiated into air-liquid  
521 interface cultures as recommended by Lonza and described by Danzy et al.<sup>69</sup>. All cells were  
522 cultured at 37°C and 5% CO<sub>2</sub> in a humidified incubator.

523

### 524 ***Viruses***

525 All viruses used in this study were generated through reverse genetics<sup>70</sup>. 293T cells transfected  
526 with reverse genetics plasmids 16-24 h prior were injected into the allantoic cavity of 9-11 day  
527 old embryonated chicken eggs and incubated at 37°C for 40-48 h. The resultant egg passage 1

528 stocks were used in experiments. Defective interfering segment content of PB2, PB1, and PA  
529 segments was confirmed to be minimal for each virus stock, following a method described  
530 previously<sup>71</sup>. The reverse genetics system for influenza A/guinea fowl/Hong Kong/WF10/99  
531 (H9N2) virus was reported previously<sup>72,73</sup>. This strain has been referred to as WF10 in previous  
532 publications<sup>72-74</sup> but, for consistency with other strains used in the present manuscript, is  
533 referred to herein as GFHK99. A low passage isolate of influenza  
534 A/mallard/Minnesota/199106/99 (H3N8) virus, referred to herein as MaMN99, was obtained  
535 from David Stallknecht at the University of Georgia<sup>75</sup>. The virus was passaged once eggs and  
536 then the eight cDNAs were generated and cloned into the pDP2002 vector<sup>76</sup>. To increase the  
537 efficiency of virus recovery for rescues containing polymerase components from the MaMN99  
538 virus, pCAGGS support plasmids encoding PB2, PB1, PA, and NP proteins of the A/WSN/33  
539 (H1N1) strain were supplied.

540 GFHK99 WT and MaMN99 VAR viruses were engineered to contain a 6XHis epitope tag  
541 plus GGGG linker at the N terminus of the HA protein following the signal peptide. GFHK99  
542 VAR<sub>1</sub> and MaMN99 WT viruses contain similarly modified HA genes, with an HA epitope tag  
543 plus a GGGG linker inserted at the N terminus of the HA protein<sup>77</sup>.

544 Silent mutations introduced by site directed mutagenesis were used to confer altered  
545 melting properties to allow high resolution melt genotyping of WT and VAR<sub>1</sub> segment origin.  
546 Mutations introduced in to GFHK99 VAR<sub>1</sub> and MaMN99 VAR viruses are listed in  
547 **Supplementary Table 1**. Mutations introduced into the GFHK99 VAR<sub>2</sub> strain were designed to  
548 confer unique primer binding sites relative to GFHK99 WT virus for use in digital PCR-based  
549 genotyping. The mutations introduced are also listed in **Supplementary Table 1**. Viruses used  
550 for single cell mRNA sequencing, GFHK99 mVAR<sub>1</sub> and GFHK99 mVAR<sub>2</sub>, were generated from  
551 the GFHK99 WT strain with no HIS tag, following the approach described in Russell et al.<sup>43</sup>. The  
552 mutations introduced were designed to be detected where sequence data is available from only  
553 the 3' end of each transcript. Site directed mutagenesis was therefore used to place two silent

554 mutations proximal to the stop codon in each viral cDNA. The mutations allow differentiation  
555 among the segments of the three strains. All such mutations are reported in **Supplementary**  
556 **Table 1**.

557

#### 558 ***Coinfection in cultured cells for quantification of coinfection and reassortment***

559 MDCK, DF-1, or A549 cells were seeded at a density of  $4 \times 10^5$  cells per well in 6-well dishes 24  
560 h before inoculation. Virus inoculum was prepared by combining WT and VAR viruses at high  
561 titer in a 1:1 ratio based on PFU titers, and then diluting in PBS to achieve MOIs ranging from  
562 10 to 0.01 PFU per cell. Synchronized infection conditions were used, as follows. Cell  
563 monolayers were washed three times with PBS and placed on ice. Chilled virus inoculum was  
564 added to each well at a 250  $\mu$ L volume and incubated at 4°C for 45 minutes with occasional  
565 rocking. Inoculum was aspirated and cell monolayer was rinsed three times with cold PBS  
566 before addition of warm virus medium. Due to low viral growth of GFHK99 virus in DF-1 cells,  
567 acid inactivation of inoculum virus was performed at 1 h post-infection for this cell type. For acid  
568 inactivation, media was aspirated and replaced with 500  $\mu$ L of PBS-HCl, pH 3.00 and incubated  
569 5 min at 37°C. Cells were then washed once with PBS before the addition of virus medium. At 3  
570 h post-infection, virus medium was replaced with ammonium chloride-containing virus medium.  
571 GFHK99 virus infected cells were harvested at 12 h post infection due to high amounts of CPE  
572 at later time points. Cells infected with MaMN99 virus and MaMN99:GFHK99 chimeric viruses  
573 were harvested at 16 h post-infection. Virus medium for each cell line was prepared by  
574 supplementing the appropriate media (MDCK, MEM; DF1, DMEM; A549, F12K) with 4.3%  
575 bovine serum albumin and penicillin (100 IU), and streptomycin (100  $\mu$ g per mL). Ammonium  
576 chloride-containing virus medium was prepared by the addition of HEPES buffer and  $\text{NH}_4\text{Cl}$  at  
577 final concentrations of 50 mM and 20 mM, respectively, to virus media.

578

579 **Determination of infection levels based on HA surface expression.** To enumerate infected  
580 cells, surface expression of HIS and HA epitope tags was detected by flow cytometry. This  
581 method was previously described in detail<sup>77</sup>. The percentage of cells that were positive for either  
582 or both epitope tags is expressed as percentage of cells HA<sup>+</sup>. The percentage of cells that were  
583 positive for both epitope tags is expressed as percentage of cells dual-HA<sup>+</sup>. The relationship  
584 between these two parameters was evaluated by plotting % cells dual-HA<sup>+</sup> against % cells HA<sup>+</sup>  
585 and regressing the resultant curve as a quadratic polynomial ( $\% \text{ cells dual-HA}^+ = \beta_2 * (\% \text{ cells}$   
586  $\text{HA}^+)^2 + \beta_1 * (\% \text{ cells HA}^+)$ , where  $\beta_2$  and  $\beta_1$  are genotype-specific). From the regression models,  
587 we then quantified the degree of linearity using the equation  $\% \text{ linearity} = \frac{|\beta_1|}{|\beta_1| + |\beta_2|}$ .

588

#### 589 **Animal models and reassortment in vivo**

590 Quail eggs obtained from the College of Veterinary Medicine, University of Georgia, were  
591 hatched at the Poultry Diagnostic and Research Center, University of Georgia. Two days before  
592 virus inoculation, quail sera were confirmed to be seronegative for IAV exposure by NP ELISA  
593 (IDEXX, Westbrook, ME). At 3-weeks of age, birds were moved into a HEPA in/out BSL2 facility  
594 and each group divided into individual isolator units.

595 Groups (n=6) of 3-week old Japanese quail (*Coturnix Japonica*) were used to determine  
596 the 50% quail infectious dose of the 1:1 GFHK99 WT and GFHK99 VAR<sub>1</sub> virus mixture. Each  
597 quail was inoculated with 500  $\mu$ l by oculo-naso-tracheal route of virus mixture in PBS, at  
598 increasing concentrations of 10<sup>0</sup> to 10<sup>6</sup> TCID<sub>50</sub> per 500  $\mu$ L. Tracheal and cloacal swab  
599 specimens were collected daily from each bird in brain heart infusion media (BHI). Swab  
600 samples were analyzed by TCID<sub>50</sub> assay and titers of tracheal swabs collected at 4 d post-  
601 inoculation were used to determine the QID<sub>50</sub> by the Reed and Muench method<sup>78</sup>. Virus was not  
602 detected in cloacal swabs. QID<sub>50</sub> was found to be equivalent to 1 TCID<sub>50</sub>.



603 To quantify reassortment in quail, samples collected from quail (n=6) infected with the  
604  $10^2$  TCID<sub>50</sub> dose of the 1:1 GFHK99 WT and GFHK99 VAR<sub>1</sub> virus mixture were used. These  
605 were the same birds as used to determine QID<sub>50</sub>. Virus shedding kinetics were determined by  
606 plaque assay of tracheal swab samples and samples from days 1, 3, and 5 were chosen for  
607 genotyping of virus isolates.

608 Female Hartley strain guinea pigs weighing 250-350 g were obtained from Charles River  
609 Laboratories. The GPID<sub>50</sub> of GFHK99 WT/VAR<sub>1</sub> and MaMN99 WT/VAR virus mixtures were  
610 determined as follows. Groups of four guinea pigs were inoculated intranasally with virus  
611 mixture in PBS at doses of  $10^0$  to  $10^5$  PFU per 300  $\mu$ L inoculum. Daily nasal washes were  
612 collected in 1 mL PBS and titered by plaque assay. Results from day 2 nasal washes were used  
613 to determine the GPID<sub>50</sub> by the Reed and Muench method<sup>78</sup>. The GPID<sub>50</sub> of GFHK99 virus was  
614 found to be  $2.1 \times 10^3$  PFU, while that of MaMN99 virus was determined to be  $2.1 \times 10^1$  PFU.

615 To evaluate reassortment kinetics in guinea pigs, groups of six animals were infected  
616 with  $10^2 \times$  GPID<sub>50</sub> of the aforementioned GFHK99 WT / VAR<sub>1</sub> virus mixture or the MaMN99 WT /  
617 VAR virus mixture. Virus inoculum was given intranasally in a 300  $\mu$ l volume of PBS. Nasal  
618 washes were performed on days 1-6 post-inoculation and titered for viral shedding by plaque  
619 assay. HRM genotyping was performed on samples collected on day 1, 3, and 5 for each  
620 guinea pig.

621

### 622 **Quantification of reassortment and effective diversity**

623 Reassortment was quantified for *in vitro* coinfection supernatants, guinea pig nasal washes, and  
624 quail tracheal swabs as described previously<sup>77</sup>. Briefly, plaque assays were performed in 10 cm  
625 dishes to isolate virus clones. 1 mL serological pipettes were used to collect agar plugs into 160  
626  $\mu$ l PBS. Using a ZR-96 viral RNA kit (Zymo), RNA was extracted from the agar plugs and eluted  
627 in 40  $\mu$ l nuclease free water (Invitrogen). Reverse transcription was performed using Maxima RT  
628 (Thermofisher) according to the manufacturer's protocol. The resulting cDNA was diluted 1:4 in

629 nuclease free water and each cDNA was combined with segment specific primers and Precision  
630 Melt Supermix (Bio-Rad) and analyzed by qPCR in a CFX384 Touch real-time PCR detection  
631 system (Bio-Rad) designed to amplify a ~100 bp region of each gene segment which contains a  
632 single nucleotide change in the VAR virus. The qPCR was followed by high-resolution melt  
633 (HRM) analysis to differentiate WT and VAR amplicons<sup>79</sup>. Precision Melt Analysis software (Bio-  
634 Rad) was used to determine the parental virus origin of each gene segment based on melting  
635 properties of the cDNAs and comparison to WT and VAR controls.

636 Viral genotypic diversity was quantified as reported previously<sup>80</sup> by calculating Simpson's  
637 Index, given by  $D = \sum(p_i^2)$ , where  $p_i$  represents the proportional abundance of each  
638 genotype<sup>81</sup>. Simpson's Index accounts for both the raw number of species and variation in  
639 abundance of each, and is sensitive to the abundance of dominant species. Because Simpson's  
640 Index does not scale linearly, each sample's Simpson's Index value was converted to a  
641 corresponding Hill number to derive its effective diversity,  $N_2 = 1/D^{82}$ , which is defined as the  
642 number of equally abundant species required to generate the observed diversity in a sample  
643 community. Because it scales linearly, Hill's  $N_2$  allows a more intuitive comparison between  
644 communities (i.e., a community with  $N_2 = 10$  species is twice as diverse as one with  $N_2 = 5$ ) and  
645 is suitable for statistical analysis by basic linear regression methods<sup>83</sup>. Robust linear models of  
646  $N_2$  vs. time were regressed using the R package robustlmm.

647

### 648 ***Single-cycle viral growth kinetics***

649 DF-1 or MDCK cells were seeded at  $4 \times 10^5$  cells per well in 6 well dishes 24 h prior to infection.  
650 GFHK99 WT / VAR<sub>1</sub> virus mixture was serially diluted using PBS. Synchronized infection  
651 conditions as described above were used with acid inactivation of inoculum virus and addition of  
652 ammonium chloride medium at 3 h post-infection. At each time point, 120  $\mu$ l supernatant was  
653 collected. Viral titers for each sample were assessed by plaque assay in MDCK cells. Each MOI  
654 condition was used in 5-6 wells in parallel infections. Three wells served as technical replicates

655 for growth curve sampling while the remaining wells were harvested at 24 h post-infection to  
656 enumerate HA expressing cells via flow cytometry. In cases where acid inactivation was  
657 inefficient, the replicate was eliminated, and data are plotted in duplicate.

658

### 659 ***Effect of increasing multiple infection on viral RNA replication***

660 For DF-1 and MDCK cell experiments, 12 well plates were seeded with  $3 \times 10^5$  cells per well 24 h  
661 prior to infection. For HTBE cells, cells were cultured at an air-liquid interface as previously  
662 described<sup>69</sup>. Cell surfaces were rinsed three times with PBS prior to inoculation. Triplicate wells  
663 were then mock infected with PBS or inoculated with 0.005 PFU per cell of GFHK99 WT and 0,  
664 0.1, 0.5, 1, 3, and 5 PFU per cell of GFHK99 VAR<sub>2</sub> virus and placed at 37°C. After 55 minutes,  
665 inoculum was aspirated, and cells were rinsed three times with PBS and virus medium was  
666 added at 500 µl per well. Media was exchanged for ammonium chloride treated media 3 h later.  
667 At 12 h post infection, virus media was removed and cells were harvested using RNeasy Protect  
668 Cell Reagent (Qiagen). RNA was extracted using RNeasy columns (Qiagen). RNA was diluted  
669 to 500 ng per µL for MDCK cells and 120 ng per µL for DF-1 cells. A 12 µl volume of this diluted  
670 RNA was used in reverse transcription with Maxima RT per protocol instructions. Digital droplet  
671 PCR was performed on the resultant cDNA using a combination of PB2, M, and NS primers  
672 specific for the GFHK99 WT virus (final primer concentration of 200 nM) with QX200™  
673 ddPCR™ EvaGreen Supermix (Bio-Rad). WT copy number is determined as cDNA copies per  
674 ng of input RNA. WT fold-change was calculated by dividing the copies/ng result obtain in each  
675 VAR<sub>2</sub> positive condition by value of copies per ng from the average of the triplicate WT-only  
676 samples.

677

### 678 ***Strand-specific quantification of viral RNA species over time***

679 MOIs used in this experiment were 0.5 RNA copies per cell for the low MOI and 3.0 HA  
680 expressing units/cell for the high MOI. Concentrations of virus mixtures in RNA copies per mL

681 were determined by quantifying at least four gene segments by ddPCR and taking the average.  
682 HA expressing units per mL was measured by counting HA positive cells via flow cytometry in  
683 the relevant cell type. Specifically, cells were infected with serial dilutions of virus under  
684 synchronized, single cycle conditions. At 24 h post infection, cells were harvested and flow  
685 cytometry was performed as described above, targeting His and HA epitope tags. HA  
686 expression units per mL for each virus and cell combination was calculated based on the linear  
687 range of %HA<sup>+</sup> cells plotted as a function of volume of virus added to cells<sup>84</sup> (**Supplementary**  
688 **Figure 3**).

689 Viruses used for this experiment were the same GFHK99 WT/VAR<sub>1</sub> or MaMN99  
690 WT/VAR virus mixtures used to measure reassortment, but in this case each mixture was  
691 considered as a single virus population (i.e. the RT ddPCR assay outlined below to quantify viral  
692 m/c/vRNA does not differentiate between WT and VAR genotypes).

693 Twelve well plates were seeded with  $2 \times 10^5$  cells per well of MDCK or DF-1 cells and  
694 incubated at 37°C for 24 h. Synchronized, single cycle infection conditions were used, as  
695 described above. Chilled virus was added at a volume of 125  $\mu$ L per well. At 0, 1, 2, 4, 6, 8, and  
696 10 h post infection, virus medium was aspirated and cells were harvested using 400  $\mu$ L of  
697 CELLprotect solution (Qiagen). RNA was extracted from infected cells using the Qiagen  
698 RNeasy Mini kit. Three reverse transcription reactions per sample were set up with three  
699 different primers, each containing different nucleotide barcode tags and targeting a distinct  
700 species (mRNA, vRNA, and cRNA) of segment 8 (**Supplementary Table 4**). Maxima RT was  
701 used according to the manufacturer's instructions and combined with 300 ng MDCK or 150 ng  
702 DF-1 RNA.

703 Absolute copy number of cDNA was determined by ddPCR. Forward and reverse  
704 primers for vRNA, mRNA, or cRNA of NS at a total concentration of 200 nM were combined with  
705 diluted cDNA and QX200™ ddPCR™ EvaGreen Supermix (Bio-Rad). Primer sequences are  
706 given in **Supplementary Table 4**. Thermocycler protocol was as follows: 95°C for 5 min, [95°C

707 for 30s, 57°C for 60s] repeat 40x, 4°C for 5 min, 90°C for 5 min, 4°C hold. Copy number was  
708 normalized to RNA input to give final results in units of copy number per ng RNA.

709

### 710 ***Single-cell mRNA sequencing***

711 For this assay, viruses were titered in DF-1 cells using flow cytometry with anti-NP antibody  
712 (Abcam, clone 9G8). DF-1 cells were used because they give allow more sensitive detection of  
713 GFHK99 virus infection than MDCK cells. Cells were infected with serial dilutions of virus under  
714 synchronized, single-cycle conditions. At 24 h post-infection, cells were harvested and flow  
715 cytometry was performed as described above, targeting NP. HA expression units per mL for  
716 each virus and cell combination was calculated based on the linear range of % cells NP<sup>+</sup> plotted  
717 as a function of volume of virus added to cells<sup>84</sup> (**Supplementary Figure 3**).

718 To preform single-cell mRNA sequencing, MDCK and DF-1 cells were seeded into 6-well  
719 plates at  $5 \times 10^5$  cells per well. At 24 h post seeding, MDCK and DF-1 cells from an extra well  
720 were harvested and re-counted to ensure accuracy of cell number for infection. MDCK or DF-1  
721 cells were then infected with a 1:1 ratio of GFHK99 WT virus and GFHK99 mVAR<sub>1</sub> virus that  
722 amounted to a MOI of 0.02, 0.06, 0.2 or 0.6 NP units per cell. GFHK99 mVAR<sub>2</sub> virus was added  
723 to MDCK and DF-1 cell infections at MOIs of 1 PFU per cell and 0.1 PFU per cell, respectively.  
724 Virus stocks were diluted serially in cold 1X PBS and incubated on ice until use. Before  
725 infection, cells were washed three times with cold 1X PBS and placed on ice. To infect, cells  
726 were inoculated with a 200  $\mu$ L volume inoculum (at appropriate concentrations) and placed on  
727 ice for 45 minutes, with rocking every 10 minutes. The inoculum was then aspirated and 2 mL of  
728 pre-warmed (at 37°C) virus medium was added. Plates were incubated at 37°C for 3 h.  
729 Afterwards, the virus medium was replaced with 2 mL of pre-warmed virus medium  
730 supplemented with HEPES buffer and NH<sub>4</sub>Cl at final concentrations of 50 mM and 20 mM,  
731 respectively. Plates were placed back into the incubator for an additional 5 h. Subsequently,

732 culture media was aspirated and cells washed once with 1X PBS. Cells were then trypsinized  
733 with 200  $\mu$ L of 0.25% Trypsin EDTA until all cells came off the plate and were mono-dispersed.  
734 To each well, 0.5 mL of virus medium was added and replicates were pooled (2 wells per MOI).  
735 Cells for each sample were counted. Samples were spun at 150 rcf for 3 minutes and washed  
736 with 0.5 mL of 1X PBS/0.04% BSA. Washings were performed two more times. Finally, cells  
737 were resuspended with 1X PBS/0.04% BSA to get a final cell count of  $7 \times 10^5$  cells per mL for  
738 each sample. Preparation for single-cell transcriptomic sequencing follows the protocol for 10x  
739 Genomics Chromium Single Cell platform.

740 Analysis of viral transcripts from single cells was performed with the sequencing data  
741 from all experiments in R using the CellRanger package ([https://github.com/bpickett/Influenza-](https://github.com/bpickett/Influenza-10X)  
742 10X). Briefly, the CellRanger software assigns each read to individual cells and transcripts  
743 based on two sets of unique molecular identifiers that are ligated prior to amplification. This  
744 approach allows the quantification of amplification bias at both the cellular and transcript levels.  
745 The first step of the analytical workflow was to map the reads to concatenated transcriptomes of  
746 IAV with the transcriptomes of dog or chicken to analyze MDCK and DF-1 cell infections,  
747 respectively. Protein coding regions for the dog and chicken transcriptomes were identified in  
748 the GTF file associated with genome builds CanFam3.1.94 and Gallus gallus-5.0.94,  
749 respectively, while IAV coding regions were extracted from the reverse-complement sequences  
750 of the GFHK99 strains. For each experiment, all transcripts with non-zero numbers of mapped  
751 reads were then normalized to the median number of transcripts per cell to enable cross-  
752 experiment comparison. The read counts for all eight unspliced IAV transcripts for each MOI  
753 and cell type were subsequently extracted from the complete set and saved in separate files. A  
754 quantitative analysis was then performed to compare the number of IAV transcripts that were  
755 identified from each of the experimental variables. Unless otherwise stated, data was analyzed

756 using total viral transcripts, derived from all eight vRNA segments. The aligned sequencing data  
757 is available on the GEO database with the accession number GSE135553.

758

759 ***Single-cell sorting assay for measurement of  $P_P$  values***

760 Segment specific  $P_P$  values were determined as previously described for influenza  
761 A/Panama/2007/99 (H3N2) virus<sup>19</sup>, and as follows.  $4 \times 10^5$  MDCK cells were seeded into each  
762 well of a 6-well dish. 24 h later, cells were washed 3x with PBS and inoculated with 0.018 PFU  
763 per cell of GFHK99 WT virus and 1 PFU per cell of GFHK99 VAR<sub>2</sub> virus in a 250  $\mu$ L volume of  
764 PBS. Virus was allowed to attach at 37°C for 1 h. Inoculum was then removed and cells were  
765 rinsed 3x with PBS and 2 mL of virus medium was added to the well. After 1 h at 37°C, medium  
766 was removed and cells were washed 3x with PBS and harvested by addition of Cell Dissociation  
767 Buffer (Corning). Cells were resuspended in complete medium and washed 3x with 2 mL FACS  
768 buffer (2% FBS in PBS). A final resuspension step was performed in PBS containing 1% FBS,  
769 10 mM HEPES, and 0.1% EDTA. Cells were strained through a cell strainer cap (Falcon) and  
770 sorted on a BD Aria II cell sorter. Gating was performed to remove debris and multiplets and  
771 one event per well was sorted into each well of a 96 well plate containing MDCK monolayers at  
772 30% confluency in 50  $\mu$ L virus medium supplemented with 1  $\mu$ g per mL TPCK-treated trypsin.  
773 Following the sort, an additional 50  $\mu$ L of virus medium plus trypsin was added to each well and  
774 plates were centrifuged at 1,800 rpm for 2 minutes to promote cell attachment. Plates were  
775 incubated at 37°C for 48 h to allow propagation of virus from the sorted cell.

776 RNA was extracted from infected cells in the 96 well plate using a ZR-96 Viral RNA Kit  
777 (Zymo Research) per manufacturer instructions. Extracted RNA was converted to cDNA using  
778 universal influenza primers<sup>85</sup> and Maxima RT according to manufacturer instructions. After  
779 conversion, cDNA was diluted 1:4 with nuclease-free water and used as template (4  $\mu$ L per  
780 reaction) for segment-specific qPCR using SsoFast EvaGreen Supermix (Bio-Rad) in 10  $\mu$ L

781 reactions, with 200 nM final primer concentration. Primers employed targeted each segment of  
782 GFHK99 WT virus, as well as the PB2 and PB1 segments of GFHK99 VAR<sub>2</sub> virus. Primer  
783 sequences are listed in **Supplementary Table 3**.

784           Given the MOI of GFHK99 WT virus used in the experiments, an appreciable number of  
785 wells are expected to receive two or more viral genomes, and so a mathematical adjustment is  
786 needed to estimate the probability of each genome segment being delivered by a single virion.  
787 Using the relationship between MOI and the fraction of cells infected from Poisson statistics,  
788 i.e.,  $f = 1 - e^{-\text{MOI}}$ , the probability of the  $i$ th segment being present in a singly infected cell, or  $P_{P,i}$   
789 can be calculated from the 96-well plate using the following equation:

790

$$P_{P,i} = \frac{\text{MOI}_i}{\text{MOI}_{\text{wt}}} = \frac{-\ln(1 - f_i)}{-\ln(1 - f_{\text{wt}})} = \frac{\ln\left(1 - \frac{C_i}{A}\right)}{\ln\left(1 - \frac{B}{A}\right)}$$

791 where  $A$  is the number of VAR<sub>2</sub><sup>+</sup> wells,  $B$  is the number of WT<sup>+</sup> wells (containing any WT  
792 segment), and  $C_i$  is the number of wells positive for the WT segment in question. Wells that  
793 were negative for VAR<sub>2</sub> virus segments were excluded from analysis.



794 **Figure Legends**

795 **Figure 1. Coinfection and reassortment frequencies indicate that IAV multiplicity**  
796 **dependence varies with virus strain and host species.** A-D) MDCK or DF-1 cells were  
797 coinfecting with homologous WT and VAR viruses of either GFHK99 or MaMN99 strain  
798 backgrounds at a range of MOIs. Following a single cycle of infection, cells were analyzed for  
799 HA expression by flow cytometry and plaque clones derived from cell supernatants were  
800 genotyped. The relationship between % cells HA positive and % cells dually HA positive (A)  
801 varies with strain and cell type, resulting in curves of differing % linearity (B). GFHK99 and  
802 MaMN99 viruses exhibit different reassortment levels in MDCK cells, but both show high  
803 reassortment relative to a theoretical prediction in which singly infected and multiply infected  
804 cells have equivalent burst sizes (C). GFHK99 virus reassortment levels differ in MDCK and DF-  
805 1 cells, but reassortment under both conditions remains high relative to the theoretical prediction  
806 in which multiple infection confers no advantage (D). In guinea pigs (n=6), GFHK99 WT and  
807 VAR<sub>1</sub> viruses exhibit higher reassortment than MaMN99 WT and VAR viruses, as indicated by  
808 increased genotypic diversity (E). The GFHK99 WT and VAR<sub>1</sub> viruses exhibit higher  
809 reassortment in guinea pigs than in quail (n=5) (F). Guinea pig data shown in panels E and F  
810 are the same. Shading represents 95% CI.

811

812 **Figure 2. Increasing MOI increases viral productivity at sub-saturating, but not saturating**  
813 **MOIs.** MDCK and DF-1 cells were infected under single cycle conditions at a range of MOIs in  
814 triplicate wells for each MOI. A-E) Viral titers observed at the indicated MOIs are plotted against  
815 time post-infection. F) Fold change in amplification (viral input / maximum output) relative to the  
816 MOI=0.01 PFU per cell condition is plotted for each virus-cell pairing. G) Burst size, calculated  
817 as maximum PFU output / number of HA<sup>+</sup> cells detected by flow cytometry, is plotted for each  
818 virus-cell pairing tested in the higher MOI range.

819

820 **Figure 3. Coinfection and reassortment of chimeric viruses reveals a major role for the**  
821 **viral polymerase.** Reverse genetics was used to place one or more genes from GFHK99 virus  
822 into a MaMN99 background. Coinfections with homologous WT and VAR strains were  
823 performed in MDCK cells as in Figure 1. The relationship between % cells HA positive and %  
824 cells dually HA positive (A) varies with genotype, resulting in curves of differing % linearity (B).  
825 Reassortment levels vary with genotype (C), with the chimeric strain carrying GFHK99 PB2,  
826 PB1, PA and NP segments exhibiting comparable levels to GFHK99. Experimental results are  
827 compared to a theoretical prediction in which singly infected and multiply infected cells have  
828 equivalent burst sizes (Prediction). Differences in reassortment levels among the viruses tested  
829 are highlighted by plotting the % reassortment at 10% HA<sup>+</sup> cells, as interpolated from each  
830 regression curve (D). Data shown for GFHK99 and MaMN99 viruses are the same as those  
831 displayed in Figure 1.

832

833 **Figure 4. Coinfection enhances GFHK99 vRNA synthesis in a dose and host dependent**  
834 **manner.** Cells were coinfecting with 0.005 PFU per cell of GFHK99 WT virus and increasing  
835 doses of GFHK99 VAR<sub>2</sub> virus. A) In MDCK and DF-1 cells, the fold change in WT vRNA copy  
836 number, relative to that detected in the absence of GFHK99 VAR<sub>2</sub> virus, is plotted for various  
837 doses of GFHK99 VAR<sub>2</sub> virus. B) In HTBE cells, the fold change in WT vRNA copy number,  
838 relative to that detected in the absence of GFHK99 VAR<sub>2</sub> virus, is plotted for various doses of  
839 GFHK99 VAR<sub>2</sub> virus. n=3 cell culture dishes per condition. Error bars represent standard error.

840

841 **Figure 5. High multiplicity of infection is needed for robust GFHK99 polymerase activity**  
842 **in MDCK cells.** Dishes of MDCK or DF-1 cells (n=3) were infected with GFHK99 or MaMN99  
843 virus at low (0.5 RNA copies per cell) or high (3 HA expressing units per cell) MOI. NS segment  
844 vRNA, mRNA, and cRNA were quantified at the indicate time points (A-F). The average fold  
845 change from initial (t=0) to peak RNA copy number is plotted for low MOI infections (G) and high

846 MOI infections (H). Error bars represent standard error. Significance was assessed by two-way  
847 ANOVA with Dunnett's test for multiple comparisons: \* $p < 0.05$ , \*\* $<0.01$ , \*\*\* $<0.001$ . ns = not  
848 significant.

849

850 **Figure 6. GFHK99 viral transcription is uniformly low in MDCK cells in the absence of**

851 **coinfecting virus.** (A) DF-1 or MDCK cells were infected with GFHK99 WT virus at three

852 different MOIs (0.67, 0.2, 0.6 NP units per cell), and the transcriptomes of 1,816 individual

853 infected cells were elucidated using the 10X Genomics Chromium platform. Ridge plots show

854 distributions of  $\log_{10}$ -transformed viral mRNA abundance, for all eight viral transcripts combined,

855 in individual infected cells. The data are stratified by cell type (MDCK cells in blue, DF-1 cells in

856 pink), MOI, and the presence of polymerase complex (light shading = cells missing PB2, PB1,

857 PA, or NP; dark shading = cells in which PB2, PB1, and PA are all detected). The absence of a

858 dark shaded distribution for MDCK cells at the lowest MOI is due to the absence of any cells in

859 which all four of these segments were detected. (B) DF-1 or MDCK cells were infected and

860 sequenced as in (A), but the inocula contained a 1:1 mixture of GFHK99 WT and GFHK99

861 mVAR<sub>1</sub> viruses at three different total MOIs (0.67, 0.2, 0.6 NP units per cell) and a constant

862 amount of GFHK99 mVAR<sub>2</sub> virus (0.1 PFU per cell in DF-1 cells, 1.0 PFU per cell in MDCK

863 cells). Left facet shows data from (A), and right facet shows data from WT/mVAR<sub>1</sub>

864 coinoculations with mVAR<sub>2</sub> virus, with WT and mVAR<sub>1</sub> transcript abundances partitioned into

865 separate distributions in each infection. Vertical lines denote the median of each distribution.

866 UMI = unique molecular identifier.

867

868 **Figure 7. Incomplete GFHK99 virus genomes are present in MDCK cells but not**

869 **sufficiently abundant to account for observed reassortment.** Incomplete viral genomes

870 were quantified experimentally by a single-cell based assay which relies on the amplification of

871 incomplete viral genomes of GFHK99 WT virus (0.018 PFU per cell) by a genetically similar

872 coinfecting virus, GFHK99 VAR<sub>2</sub>. Based on the rate of detection of GFHK99 WT virus segments  
873 in this assay, the probability that a given segment would be present and replicated in a singly  
874 infected MDCK cell is reported as  $P_p$ . A) Summary of experimental  $P_p$  data.  $n = 2$  biological  
875 replicates, shown in blue and red. Shading represents 95% CI. B) Experimentally obtained  $P_p$   
876 values in A were used to parameterize a computational model<sup>18</sup>. Levels of reassortment  
877 predicted using the experimentally determined parameters are shown in red and blue. Levels of  
878 reassortment predicted if  $P_p=1.0$  are shown with the dashed line. Observed reassortment of  
879 GFHK99 WT and VAR viruses in MDCK cells are shown with black circles. Observed data are  
880 the same as those plotted in Figure 1.

881

## 882 References

- 883 1 Leeks, A., Sanjuan, R. & West, S. A. The evolution of collective infectious units in viruses. *Virus*  
884 *Res* **265**, 94-101, doi:10.1016/j.virusres.2019.03.013 (2019).
- 885 2 Brooke, C. B. Population Diversity and Collective Interactions during Influenza Virus Infection. *J*  
886 *Virol* **91**, doi:10.1128/JVI.01164-17 (2017).
- 887 3 Sanjuan, R. Collective Infectious Units in Viruses. *Trends Microbiol* **25**, 402-412,  
888 doi:10.1016/j.tim.2017.02.003 (2017).
- 889 4 Santiana, M. *et al.* Vesicle-Cloaked Virus Clusters Are Optimal Units for Inter-organismal Viral  
890 Transmission. *Cell Host Microbe* **24**, 208-220 e208, doi:10.1016/j.chom.2018.07.006 (2018).
- 891 5 Chen, Y. H. *et al.* Phosphatidylserine vesicles enable efficient en bloc transmission of  
892 enteroviruses. *Cell* **160**, 619-630, doi:10.1016/j.cell.2015.01.032 (2015).
- 893 6 Erickson, A. K. *et al.* Bacteria Facilitate Enteric Virus Co-infection of Mammalian Cells and  
894 Promote Genetic Recombination. *Cell Host Microbe* **23**, 77-88 e75,  
895 doi:10.1016/j.chom.2017.11.007 (2018).
- 896 7 Andreu-Moreno, I. & Sanjuan, R. Collective Infection of Cells by Viral Aggregates Promotes Early  
897 Viral Proliferation and Reveals a Cellular-Level Allee Effect. *Current biology : CB* **28**, 3212-  
898 3219.e3214, doi:10.1016/j.cub.2018.08.028 (2018).
- 899 8 Cuevas, J. M., Duran-Moreno, M. & Sanjuan, R. Multi-virion infectious units arise from free viral  
900 particles in an enveloped virus. *Nat Microbiol* **2**, 17078, doi:10.1038/nmicrobiol.2017.78 (2017).
- 901 9 Cifuentes-Munoz, N., Dutch, R. E. & Cattaneo, R. Direct cell-to-cell transmission of respiratory  
902 viruses: The fast lanes. *PLoS Pathog* **14**, e1007015, doi:10.1371/journal.ppat.1007015 (2018).
- 903 10 Lawrence, D. M. *et al.* Measles virus spread between neurons requires cell contact but not CD46  
904 expression, syncytium formation, or extracellular virus production. *J Virol* **74**, 1908-1918,  
905 doi:10.1128/jvi.74.4.1908-1918.2000 (2000).
- 906 11 McDonald, D. *et al.* Recruitment of HIV and its receptors to dendritic cell-T cell junctions. *Science*  
907 **300**, 1295-1297, doi:10.1126/science.1084238 (2003).
- 908 12 Shirogane, Y., Watanabe, S. & Yanagi, Y. Cooperation between different RNA virus genomes  
909 produces a new phenotype. *Nat Commun* **3**, 1235, doi:10.1038/ncomms2252 (2012).

- 910 13 Ciota, A. T., Ehrbar, D. J., Van Slyke, G. A., Willsey, G. G. & Kramer, L. D. Cooperative interactions  
911 in the West Nile virus mutant swarm. *BMC Evol Biol* **12**, 58, doi:10.1186/1471-2148-12-58  
912 (2012).
- 913 14 Xue, K. S., Hooper, K. A., Ollodart, A. R., Dingens, A. S. & Bloom, J. D. Cooperation between  
914 distinct viral variants promotes growth of H3N2 influenza in cell culture. *Elife* **5**, e13974,  
915 doi:10.7554/eLife.13974 (2016).
- 916 15 Brooke, C. B., Ince, W. L., Wei, J., Bennink, J. R. & Yewdell, J. W. Influenza A virus nucleoprotein  
917 selectively decreases neuraminidase gene-segment packaging while enhancing viral fitness and  
918 transmissibility. *Proc Natl Acad Sci U S A* **111**, 16854-16859, doi:10.1073/pnas.1415396111  
919 (2014).
- 920 16 Brooke, C. B. *et al.* Most influenza A virions fail to express at least one essential viral protein. *J*  
921 *Virology* **87**, 3155-3162, doi:10.1128/jvi.02284-12 (2013).
- 922 17 Sun, J. & Brooke, C. B. Influenza A Virus Superinfection Potential Is Regulated by Viral Genomic  
923 Heterogeneity. *MBio* **9**, doi:10.1128/mBio.01761-18 (2018).
- 924 18 Fonville, J. M., Marshall, N., Tao, H., Steel, J. & Lowen, A. C. Influenza Virus Reassortment Is  
925 Enhanced by Semi-infectious Particles but Can Be Suppressed by Defective Interfering Particles.  
926 *PLoS Pathog* **11**, e1005204, doi:10.1371/journal.ppat.1005204 (2015).
- 927 19 Jacobs, N. T. *et al.* Incomplete influenza A virus genomes occur frequently but are readily  
928 complemented during localized viral spread. *Nature Communications* (2019).
- 929 20 Nayak, D. P. Defective interfering influenza viruses. *Annu Rev Microbiol* **34**, 619-644,  
930 doi:10.1146/annurev.mi.34.100180.003155 (1980).
- 931 21 Von Magnus, P. Incomplete forms of influenza virus. *Adv Virus Res* **2**, 59-79 (1954).
- 932 22 Brooke, C. B. Biological activities of 'noninfectious' influenza A virus particles. *Future Virol* **9**, 41-  
933 51, doi:10.2217/fvl.13.118 (2014).
- 934 23 Timm, C., Gupta, A. & Yin, J. Robust kinetics of an RNA virus: Transcription rates are set by  
935 genome levels. *Biotechnology and bioengineering* **112**, 1655-1662, doi:10.1002/bit.25578  
936 (2015).
- 937 24 Boulle, M. *et al.* HIV Cell-to-Cell Spread Results in Earlier Onset of Viral Gene Expression by  
938 Multiple Infections per Cell. *PLoS Pathog* **12**, e1005964, doi:10.1371/journal.ppat.1005964  
939 (2016).
- 940 25 Sanjuán, R. & Thoulouze, M.-I. Why viruses sometimes disperse in groups?(†). *Virus Evol* **5**,  
941 vez014-vez014, doi:10.1093/ve/vez014 (2019).
- 942 26 Sigal, A. *et al.* Cell-to-cell spread of HIV permits ongoing replication despite antiretroviral  
943 therapy. *Nature* **477**, 95-98, doi:10.1038/nature10347 (2011).
- 944 27 Webster, R. G., Hinshaw, V. S., Bean, W. J., Jr., Turner, B. & Shortridge, K. F. Influenza viruses  
945 from avian and porcine sources and their possible role in the origin of human pandemic strains.  
946 *Dev Biol Stand* **39**, 461-468 (1977).
- 947 28 Wright, P. F., Neumann, G. & Kawaoka, Y. in *Fields Virology* Vol. 1 (ed D. M. & Howley Knipe, P.  
948 M.) 1691-1740 (Lippincott-Raven, 2006).
- 949 29 Webster, R. G., Bean, W. J., Gorman, O. T., Chambers, T. M. & Kawaoka, Y. Evolution and ecology  
950 of influenza A viruses. *Microbiol Rev* **56**, 152-179 (1992).
- 951 30 Webster, R. G., Shortridge, K. F. & Kawaoka, Y. Influenza: interspecies transmission and  
952 emergence of new pandemics. *FEMS Immunol Med Microbiol* **18**, 275-279, doi:S0928-  
953 8244(97)00058-8 [pii] (1997).
- 954 31 Taubenberger, J. K. & Morens, D. M. 1918 Influenza: the mother of all pandemics. *Emerg Infect*  
955 *Dis* **12**, 15-22 (2006).
- 956 32 Viboud, C., Miller, M., Olson, D., Osterholm, M. & Simonsen, L. Preliminary Estimates of  
957 Mortality and Years of Life Lost Associated with the 2009 A/H1N1 Pandemic in the US and

- 958 Comparison with Past Influenza Seasons. *PLoS Curr*, RRN1153, doi:k/-/-/35hpbbywfdwl4n/8 [pii]  
959 (2010).
- 960 33 Long, J. S., Mistry, B., Haslam, S. M. & Barclay, W. S. Host and viral determinants of influenza A  
961 virus species specificity. *Nat Rev Microbiol* **17**, 67-81, doi:10.1038/s41579-018-0115-z (2019).
- 962 34 Rajsbaum, R. *et al.* Species-specific inhibition of RIG-I ubiquitination and IFN induction by the  
963 influenza A virus NS1 protein. *PLoS Pathog* **8**, e1003059, doi:10.1371/journal.ppat.1003059  
964 (2012).
- 965 35 Manz, B. *et al.* Pandemic influenza A viruses escape from restriction by human MxA through  
966 adaptive mutations in the nucleoprotein. *PLoS Pathog* **9**, e1003279,  
967 doi:10.1371/journal.ppat.1003279
- 968 PPATHOGENS-D-12-02051 [pii] (2013).
- 969 36 Lowen, A. C. Constraints, Drivers, and Implications of Influenza A Virus Reassortment. *Annual*  
970 *review of virology* **4**, 105-121, doi:10.1146/annurev-virology-101416-041726 (2017).
- 971 37 Scholtissek, C. Molecular evolution of influenza viruses. *Virus Genes* **11**, 209-215 (1995).
- 972 38 Ma, E. J., Hill, N. J., Zabilansky, J., Yuan, K. & Runstadler, J. A. Reticulate evolution is favored in  
973 influenza niche switching. *Proc Natl Acad Sci U S A* **113**, 5335-5339,  
974 doi:10.1073/pnas.1522921113 (2016).
- 975 39 Kilbourne, E. D. Influenza pandemics of the 20th century. *Emerg Infect Dis* **12**, 9-14 (2006).
- 976 40 Smith, G. J. *et al.* Origins and evolutionary genomics of the 2009 swine-origin H1N1 influenza A  
977 epidemic. *Nature* **459**, 1122-1125, doi:nature08182 [pii]  
978 10.1038/nature08182 (2009).
- 979 41 Kayed, A. S. *et al.* Surveillance for avian influenza viruses in wild birds at live bird markets, Egypt,  
980 2014-2016. *Influenza Other Respir Viruses* **13**, 407-414, doi:10.1111/irv.12634 (2019).
- 981 42 Xu, K. M. *et al.* The genesis and evolution of H9N2 influenza viruses in poultry from southern  
982 China, 2000 to 2005. *J Virol* **81**, 10389-10401, doi:10.1128/JVI.00979-07 (2007).
- 983 43 Russell, A. B., Trapnell, C. & Bloom, J. D. Extreme heterogeneity of influenza virus infection in  
984 single cells. *Elife* **7**, doi:10.7554/eLife.32303 (2018).
- 985 44 Zheng, G. X. *et al.* Massively parallel digital transcriptional profiling of single cells. *Nat Commun*  
986 **8**, 14049, doi:10.1038/ncomms14049 (2017).
- 987 45 Palese, P. & Shaw, M. L. in *Fields Virology* Vol. 1 (ed D. M. & Howley Knipe, P. M.) Ch. 41, 1151-  
988 1185 (Lippincott-Raven, 2013).
- 989 46 Lowen, A. C. It's in the mix: Reassortment of segmented viral genomes. *PLoS Pathog* **14**,  
990 e1007200, doi:10.1371/journal.ppat.1007200 (2018).
- 991 47 Krystal, M., Li, R., Lyles, D., Pavlakis, G. & Palese, P. Expression of the three influenza virus  
992 polymerase proteins in a single cell allows growth complementation of viral mutants. *Proc Natl*  
993 *Acad Sci U S A* **83**, 2709-2713, doi:10.1073/pnas.83.8.2709 (1986).
- 994 48 Naffakh, N., Tomoiu, A., Rameix-Welti, M. A. & van der Werf, S. Host restriction of avian  
995 influenza viruses at the level of the ribonucleoproteins. *Annu Rev Microbiol* **62**, 403-424,  
996 doi:10.1146/annurev.micro.62.081307.162746 (2008).
- 997 49 Mehle, A. & Doudna, J. A. Adaptive strategies of the influenza virus polymerase for replication in  
998 humans. *Proc Natl Acad Sci U S A* **106**, 21312-21316, doi:0911915106 [pii]  
999 10.1073/pnas.0911915106 (2009).
- 1000 50 Long, J. S. *et al.* Species difference in ANP32A underlies influenza A virus polymerase host  
1001 restriction. *Nature* **529**, 101-104, doi:10.1038/nature16474 (2016).
- 1002 51 Te Velhuis, A. J. W. *et al.* Mini viral RNAs act as innate immune agonists during influenza virus  
1003 infection. *Nature microbiology* **3**, 1234-1242, doi:10.1038/s41564-018-0240-5 (2018).



- 1004 52 Schelker, M. *et al.* Viral RNA Degradation and Diffusion Act as a Bottleneck for the Influenza A  
1005 Virus Infection Efficiency. *PLOS Computational Biology* **12**, e1005075,  
1006 doi:10.1371/journal.pcbi.1005075 (2016).
- 1007 53 Butt, K. M. *et al.* Human infection with an avian H9N2 influenza A virus in Hong Kong in 2003. *J*  
1008 *Clin Microbiol* **43**, 5760-5767, doi:43/11/5760 [pii]  
1009 10.1128/JCM.43.11.5760-5767.2005 (2005).
- 1010 54 Peiris, M. *et al.* Human infection with influenza H9N2. *Lancet* **354**, 916-917,  
1011 doi:S0140673699033115 [pii] (1999).
- 1012 55 Guan, Y. *et al.* H9N2 influenza viruses possessing H5N1-like internal genomes continue to  
1013 circulate in poultry in southeastern China. *J Virol* **74**, 9372-9380 (2000).
- 1014 56 Guan, Y., Shortridge, K. F., Krauss, S. & Webster, R. G. Molecular characterization of H9N2  
1015 influenza viruses: were they the donors of the "internal" genes of H5N1 viruses in Hong Kong?  
1016 *Proc Natl Acad Sci U S A* **96**, 9363-9367 (1999).
- 1017 57 Lam, T. T. *et al.* The genesis and source of the H7N9 influenza viruses causing human infections  
1018 in China. *Nature* **502**, 241-244, doi:10.1038/nature12515  
1019 nature12515 [pii] (2013).
- 1020 58 Wu, A. *et al.* Sequential Reassortments Underlie Diverse Influenza H7N9 Genotypes in China.  
1021 *Cell Host Microbe* **4**, 446-452, doi:S1931-3128(13)00298-9 [pii]  
1022 10.1016/j.chom.2013.09.001 (2013).
- 1023 59 Gu, M., Xu, L., Wang, X. & Liu, X. Current situation of H9N2 subtype avian influenza in China. *Vet*  
1024 *Res* **48**, 49-49, doi:10.1186/s13567-017-0453-2 (2017).
- 1025 60 Pusch, E. A. & Suarez, D. L. The Multifaceted Zoonotic Risk of H9N2 Avian Influenza. *Vet Sci* **5**, 82,  
1026 doi:10.3390/vetsci5040082 (2018).
- 1027 61 White, M. C. & Lowen, A. C. Implications of segment mismatch for influenza A virus evolution. *J*  
1028 *Gen Virol* **99**, 3-16, doi:10.1099/jgv.0.000989 (2018).
- 1029 62 Villa, M. & Lassig, M. Fitness cost of reassortment in human influenza. *PLoS Pathog* **13**,  
1030 e1006685, doi:10.1371/journal.ppat.1006685 (2017).
- 1031 63 Varble, A. *et al.* Influenza A virus transmission bottlenecks are defined by infection route and  
1032 recipient host. *Cell Host Microbe* **16**, 691-700, doi:10.1016/j.chom.2014.09.020 (2014).
- 1033 64 Gallagher, M. E., Brooke, C. B., Ke, R. & Koelle, K. Causes and Consequences of Spatial Within-  
1034 Host Viral Spread. *Viruses* **10**, doi:10.3390/v10110627 (2018).
- 1035 65 Chao, L., Tran, T. & Matthews, C. Muller's Ratchet and the Advantage of Sex in the Rna Virus 6.  
1036 *Evolution; international journal of organic evolution* **46**, 289-299, doi:10.1111/j.1558-  
1037 5646.1992.tb02038.x (1992).
- 1038 66 Froissart, R. *et al.* Co-infection weakens selection against epistatic mutations in RNA viruses.  
1039 *Genetics* **168**, 9-19, doi:10.1534/genetics.104.030205 (2004).
- 1040 67 Novella, I. S., Reissig, D. D. & Wilke, C. O. Density-dependent selection in vesicular stomatitis  
1041 virus. *J Virol* **78**, 5799-5804, doi:10.1128/JVI.78.11.5799-5804.2004 (2004).
- 1042 68 Wilke, C. O. & Novella, I. S. Phenotypic mixing and hiding may contribute to memory in viral  
1043 quasispecies. *BMC Microbiol* **3**, 11, doi:10.1186/1471-2180-3-11 (2003).
- 1044 69 Danzy, S. *et al.* Mutations to PB2 and NP proteins of an avian influenza virus combine to confer  
1045 efficient growth in primary human respiratory cells. *J Virol* **88**, 13436-13446,  
1046 doi:10.1128/JVI.01093-14 (2014).
- 1047 70 Hoffmann, E., Neumann, G., Kawaoka, Y., Hobom, G. & Webster, R. G. A DNA transfection  
1048 system for generation of influenza A virus from eight plasmids. **97**, 6108-6113,  
1049 doi:10.1073/pnas.100133697 %J Proceedings of the National Academy of Sciences (2000).

- 1050 71 Schwartz, S. L. & Lowen, A. C. Droplet digital PCR: A novel method for detection of influenza  
1051 virus defective interfering particles. *J Virol Methods* **237**, 159-165,  
1052 doi:10.1016/j.jviromet.2016.08.023 (2016).
- 1053 72 Perez, D. R., Webby, R. J., Hoffmann, E. & Webster, R. G. Land-based birds as potential  
1054 disseminators of avian mammalian reassortant influenza A viruses. *Avian Dis* **47**, 1114-1117  
1055 (2003).
- 1056 73 Song, H., Nieto, G. R. & Perez, D. R. A new generation of modified live-attenuated avian  
1057 influenza viruses using a two-strategy combination as potential vaccine candidates. *J Virol* **81**,  
1058 9238-9248, doi:JVI.00893-07 [pii]  
1059 10.1128/JVI.00893-07 (2007).
- 1060 74 Sorrell, E. M., Wan, H., Araya, Y., Song, H. & Perez, D. R. Minimal molecular constraints for  
1061 respiratory droplet transmission of an avian-human H9N2 influenza A virus. *Proc Natl Acad Sci U*  
1062 *S A* **106**, 7565-7570, doi:0900877106 [pii]  
1063 10.1073/pnas.0900877106 (2009).
- 1064 75 Brown, J. D. *et al.* Intestinal excretion of a wild bird-origin H3N8 low pathogenic avian influenza  
1065 virus in mallards (*Anas Platyrhynchos*). *Journal of wildlife diseases* **48**, 991-998,  
1066 doi:10.7589/2011-09-280 (2012).
- 1067 76 Chen, H. *et al.* Partial and full PCR-based reverse genetics strategy for influenza viruses. *PLoS*  
1068 *One* **7**, e46378, doi:10.1371/journal.pone.0046378  
1069 PONE-D-12-21490 [pii] (2012).
- 1070 77 Marshall, N., Priyamvada, L., Ende, Z., Steel, J. & Lowen, A. C. Influenza virus reassortment  
1071 occurs with high frequency in the absence of segment mismatch. *PLoS Pathog* **9**, e1003421,  
1072 doi:10.1371/journal.ppat.1003421 (2013).
- 1073 78 Reed, L. J. & Muench, H. A SIMPLE METHOD OF ESTIMATING FIFTY PER CENT ENDPOINTS<sup>12</sup>.  
1074 *American Journal of Epidemiology* **27**, 493-497, doi:10.1093/oxfordjournals.aje.a118408 (1938).
- 1075 79 Wittwer, C. T., Reed, G. H., Gundry, C. N., Vandersteen, J. G. & Pryor, R. J. High-resolution  
1076 genotyping by amplicon melting analysis using LCGreen. *Clin Chem* **49**, 853-860 (2003).
- 1077 80 Richard, M., Herfst, S., Tao, H., Jacobs, N. T. & Lowen, A. C. Influenza A virus reassortment is  
1078 limited by anatomical compartmentalization following co-infection via distinct routes. *J Virol*,  
1079 doi:10.1128/JVI.02063-17 (2017).
- 1080 81 Simpson, E. H. Measurement of diversity. *Nature* **163**, 688-688 (1949).
- 1081 82 Hill, M. O. Diversity and evenness: a unifying notation and its consequences. *Ecology* **54**, 427-  
1082 432 (1973).
- 1083 83 Jost, L. Entropy and diversity. *Oikos* **113**, 363-375 (2006).
- 1084 84 Drayman, N., Kler, S., Ben-nun-Shaul, O. & Oppenheim, A. Rapid method for SV40 titration. *J*  
1085 *Virol Methods* **164**, 145-147, doi:10.1016/j.jviromet.2009.12.003 (2010).
- 1086 85 Zhou, B. *et al.* Single-reaction genomic amplification accelerates sequencing and vaccine  
1087 production for classical and Swine origin human influenza A viruses. *J Virol* **83**, 10309-10313,  
1088 doi:JVI.01109-09 [pii]  
1089 10.1128/JVI.01109-09 (2009).
- 1090



# Figure 1

bioRxiv preprint doi: <https://doi.org/10.1101/736108>; this version posted August 15, 2019. The copyright holder for this preprint (which was not certified by peer review) is the author/funder, who has granted bioRxiv a license to display the preprint in perpetuity. It is made available under aCC-BY-NC-ND 4.0 International license.

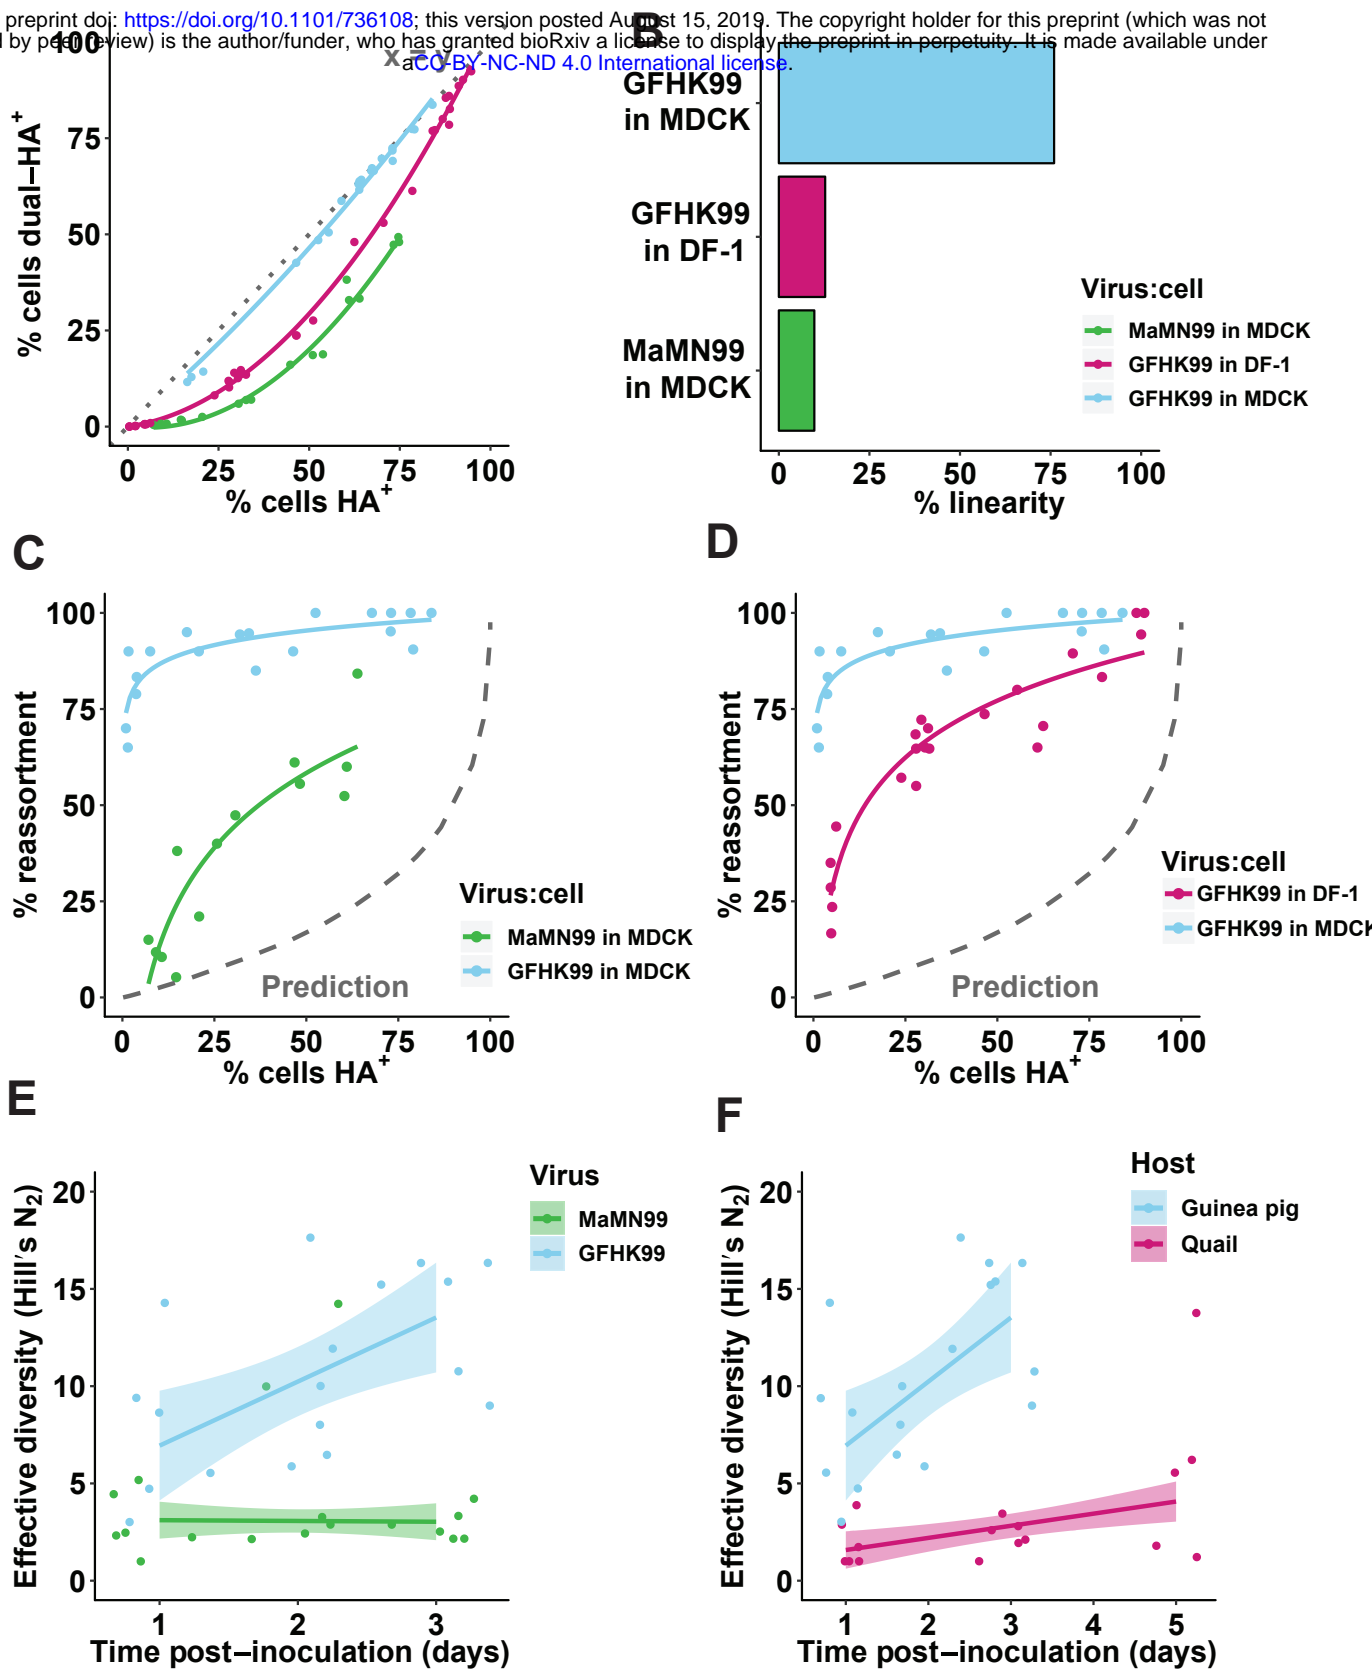

# Figure 2

bioRxiv preprint doi: <https://doi.org/10.1101/736108>; this version posted August 15, 2019. The copyright holder for this preprint (which was not certified by peer review) is the author/funder, who has granted bioRxiv a license to display the preprint in perpetuity. It is made available under aCC-BY-NC-ND 4.0 International license.

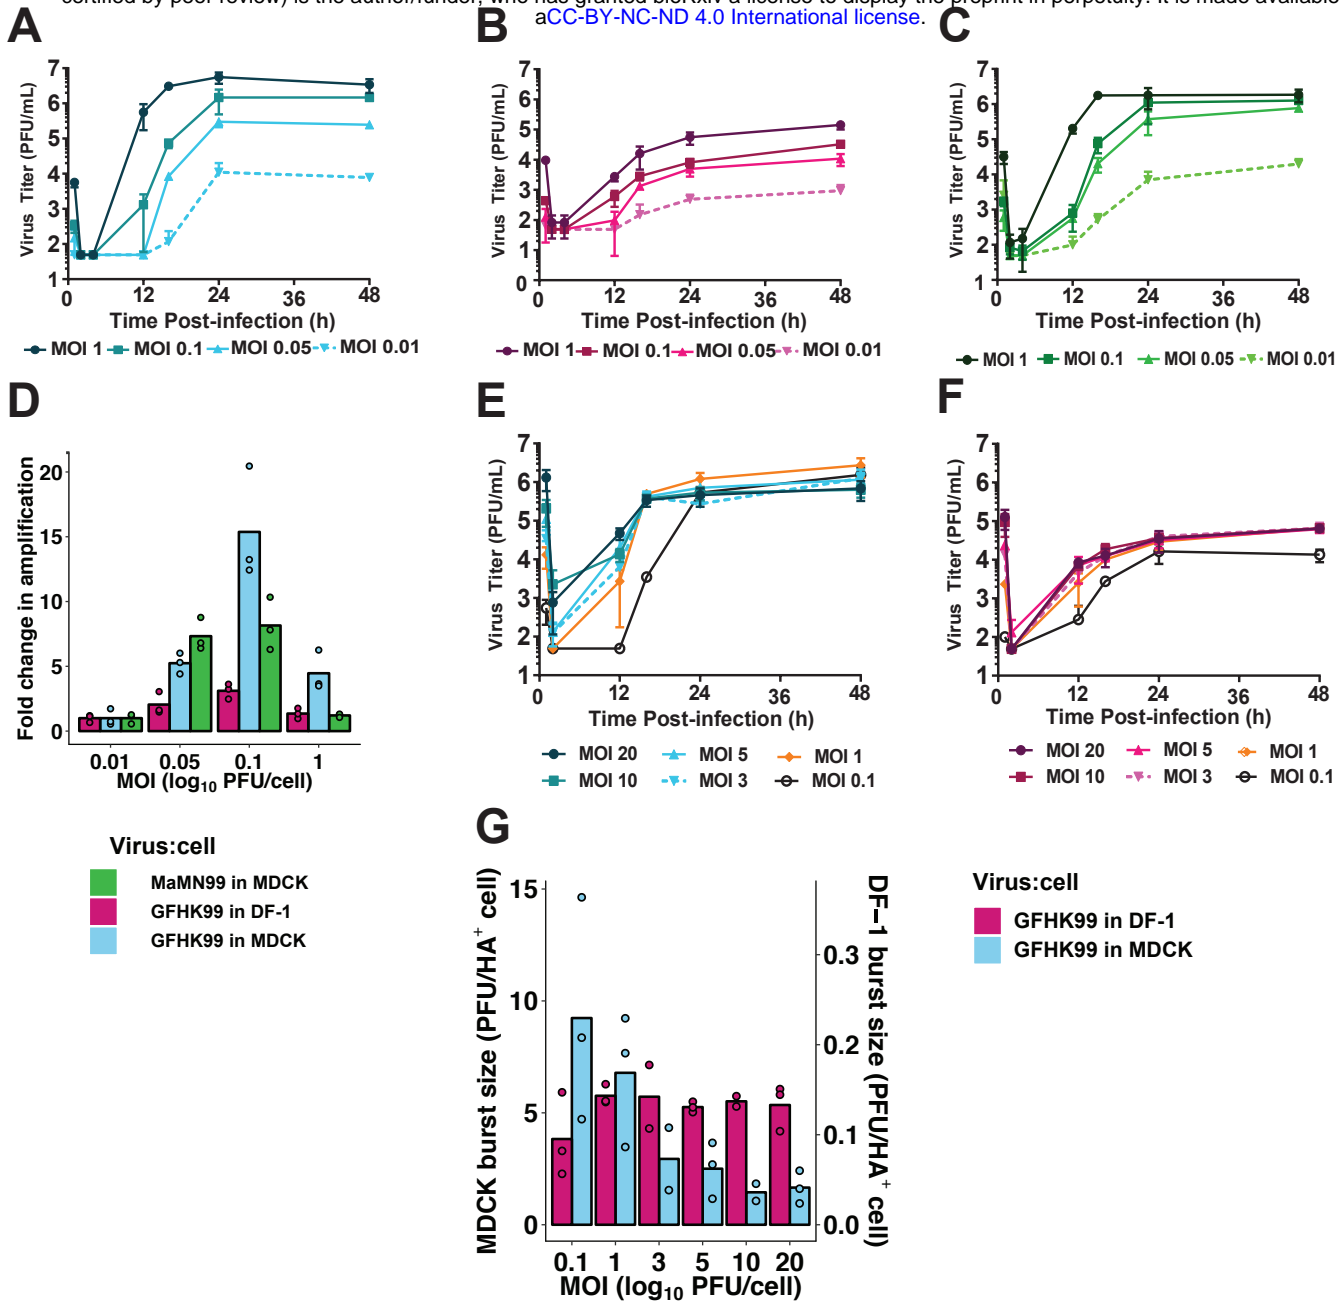

# Figure 3

bioRxiv preprint doi: <https://doi.org/10.1101/736108>; this version posted August 15, 2019. The copyright holder for this preprint (which was not certified by peer review) is the author/funder, who has granted bioRxiv a license to display the preprint in perpetuity. It is made available under aCC-BY-NC-ND 4.0 International license.

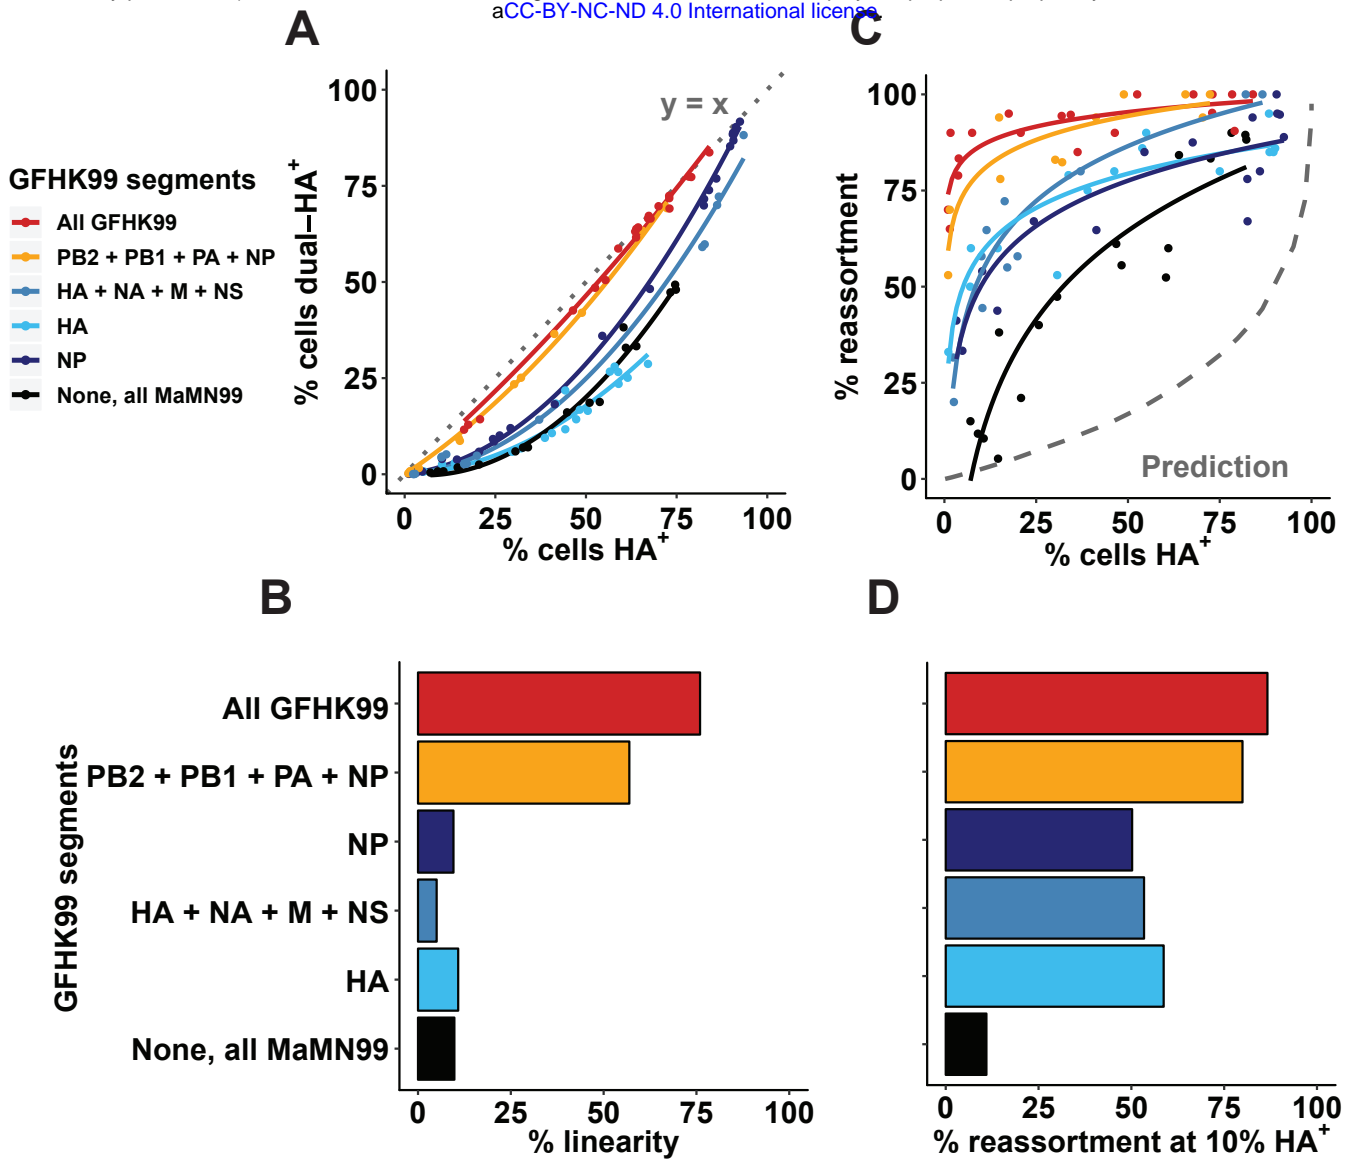

# Figure 4

bioRxiv preprint doi: <https://doi.org/10.1101/736108>; this version posted August 15, 2019. The copyright holder for this preprint (which was not certified by peer review) is the author/funder, who has granted bioRxiv a license to display the preprint in perpetuity. It is made available under aCC-BY-NC-ND 4.0 International license.

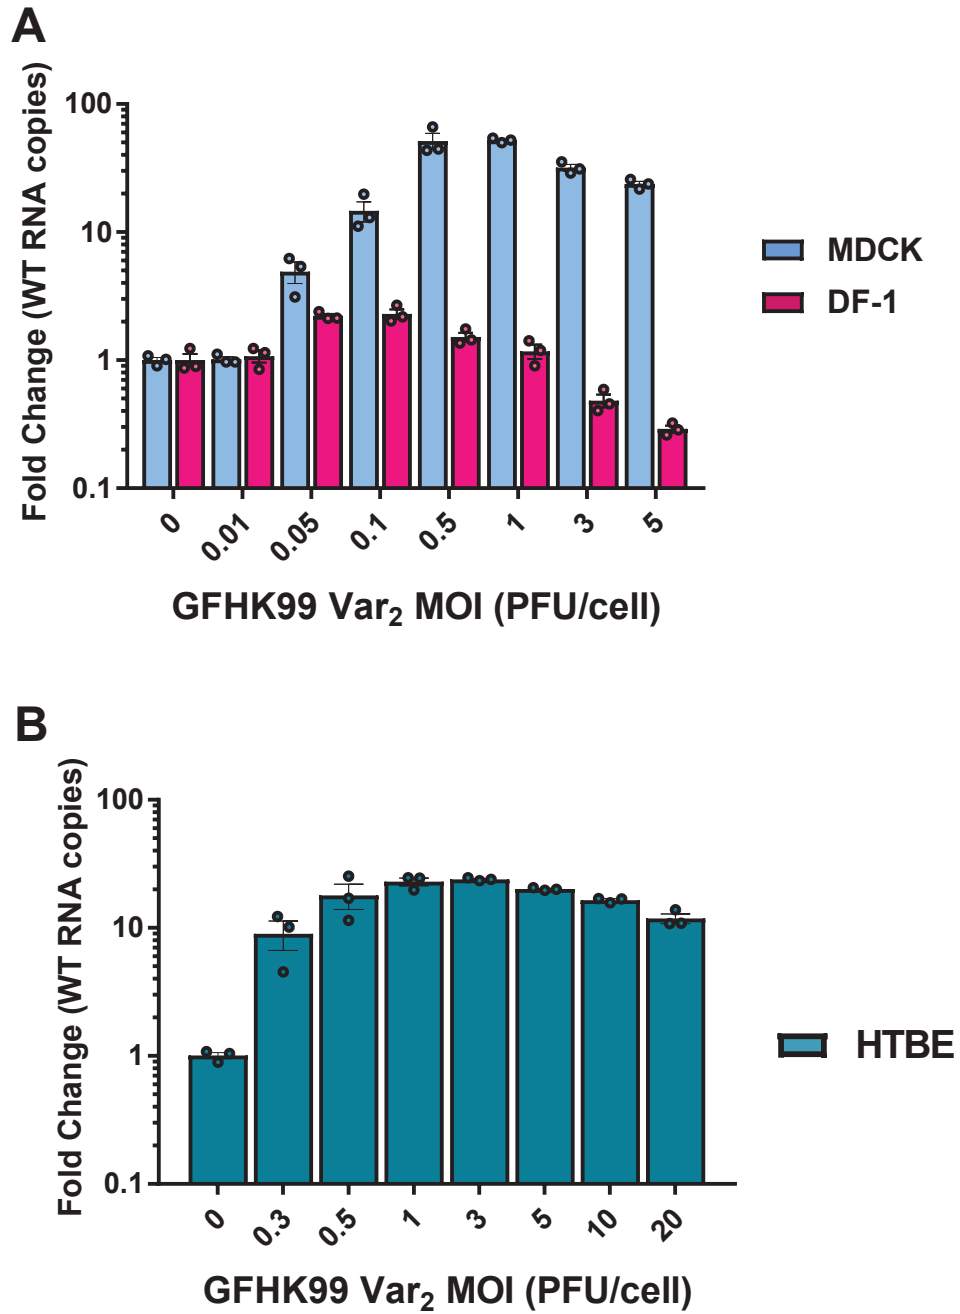

# Figure 5

bioRxiv preprint doi: <https://doi.org/10.1101/736108>; this version posted August 15, 2019. The copyright holder for this preprint (which was not certified by peer review) is the author/funder, who has granted bioRxiv a license to display the preprint in perpetuity. It is made available under aCC-BY-NC-ND 4.0 International license.

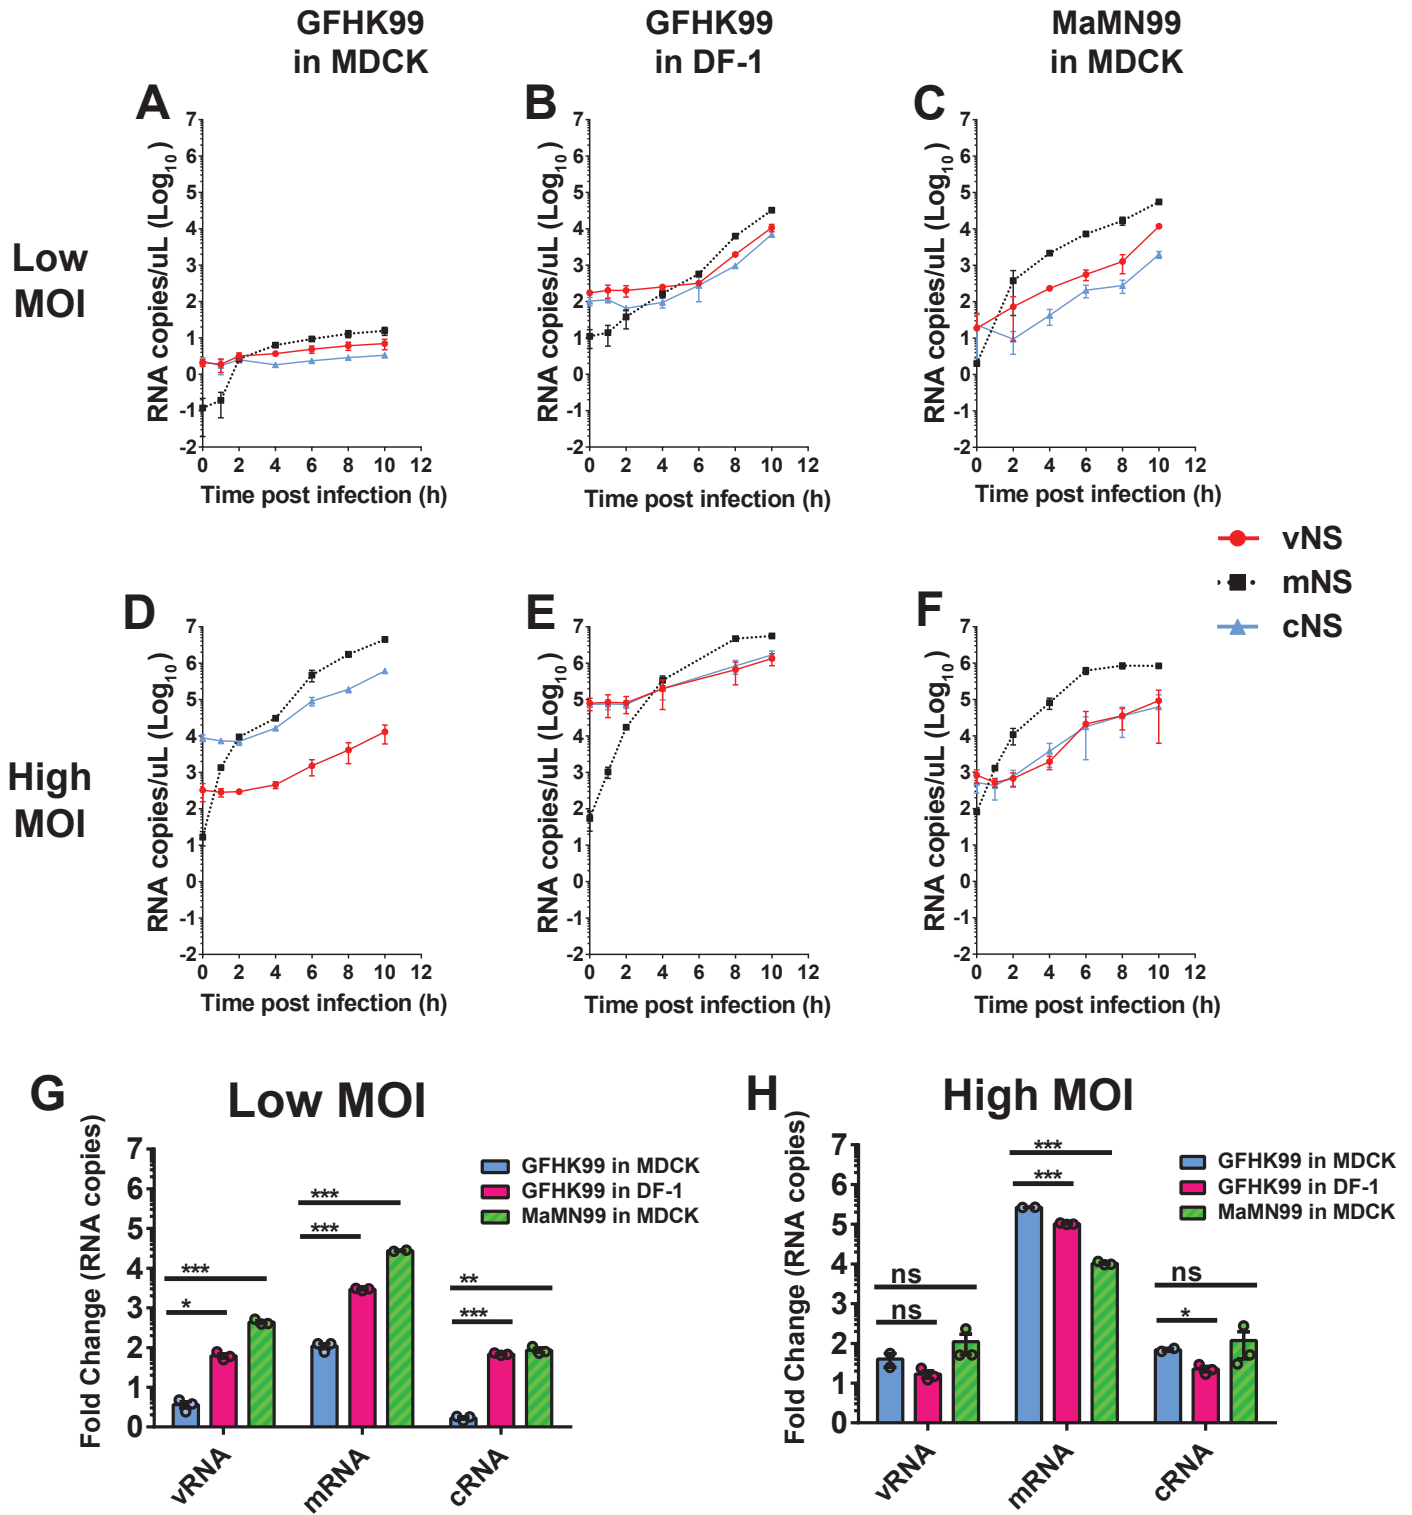

# Figure 6

bioRxiv preprint doi: <https://doi.org/10.1101/736108>; this version posted August 15, 2019. The copyright holder for this preprint (which was not certified by peer review) is the author/funder, who has granted bioRxiv a license to display the preprint in perpetuity. It is made available under aCC-BY-NC-ND 4.0 International license.

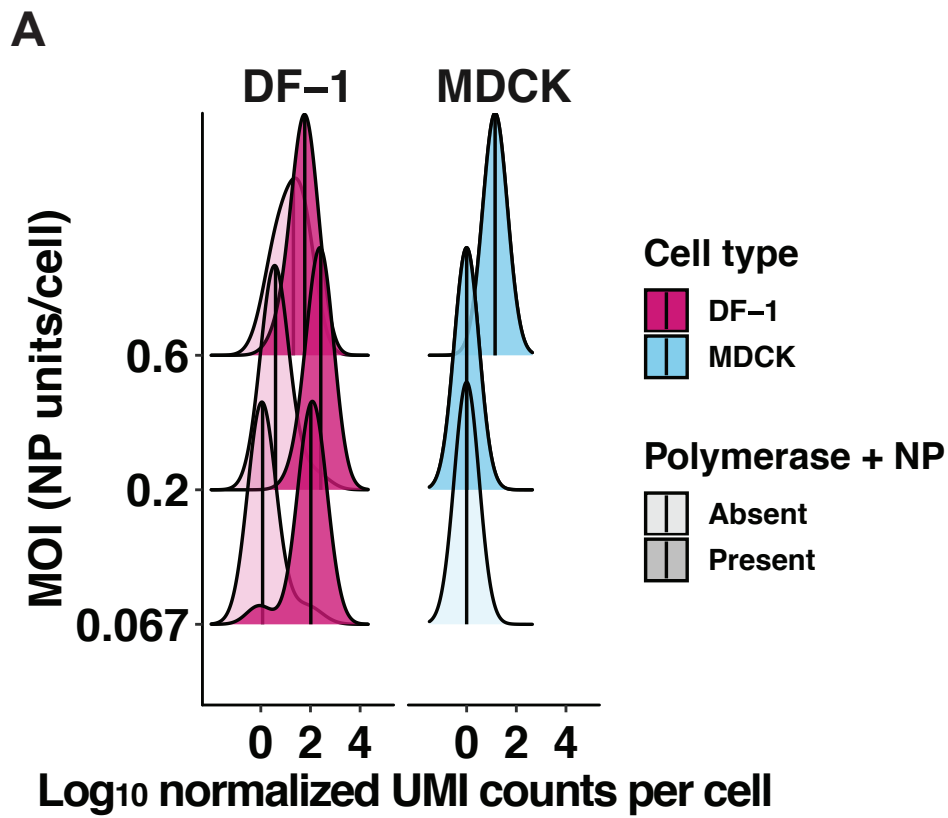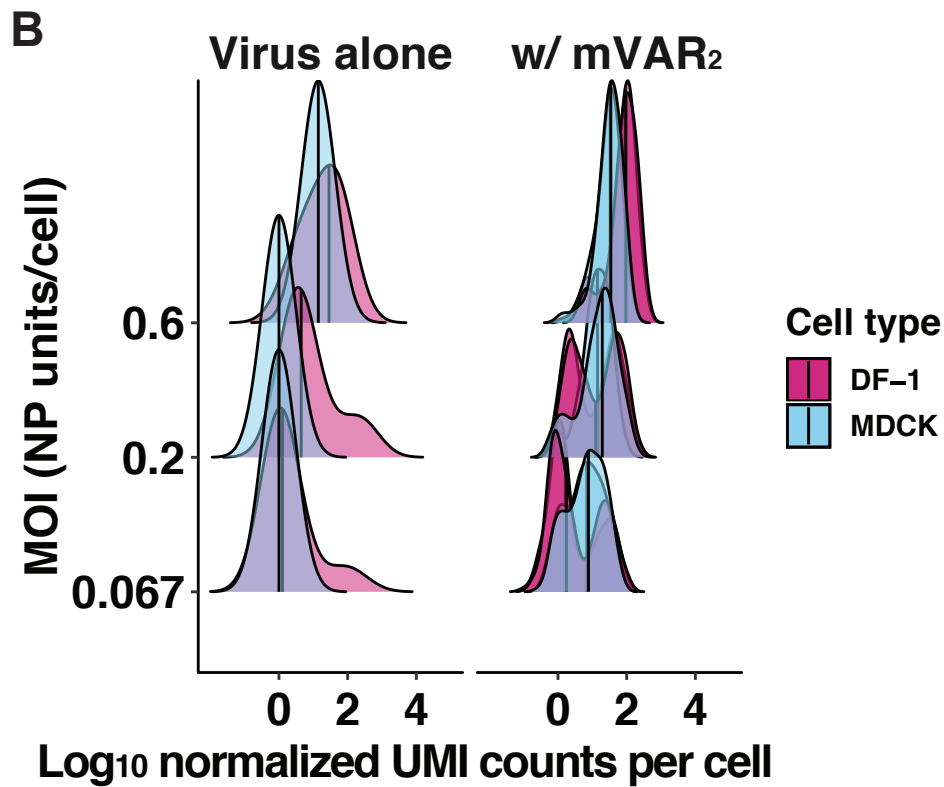

# Figure 7

bioRxiv preprint doi: <https://doi.org/10.1101/736108>; this version posted August 15, 2019. The copyright holder for this preprint (which was not certified by peer review) is the author/funder, who has granted bioRxiv a license to display the preprint in perpetuity. It is made available under aCC-BY-NC-ND 4.0 International license.

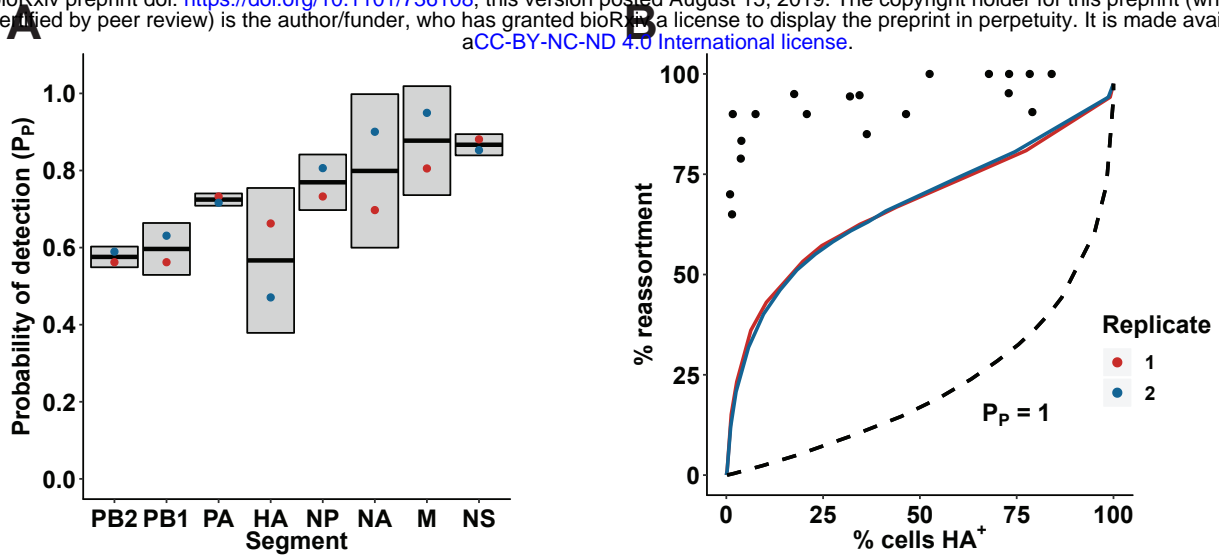

Source: https://www.biorxiv.org/content/10.1101/736108v1.full.pdf
