# Supplementary material for: Collective interactions augment influenza A virus replication in a host-dependent manner
Source: bioRxiv or medRxiv preprint supplement (doi:10.1101/736108), 2020-03-07
Supplement: Supplementary file [file media-1.pdf]

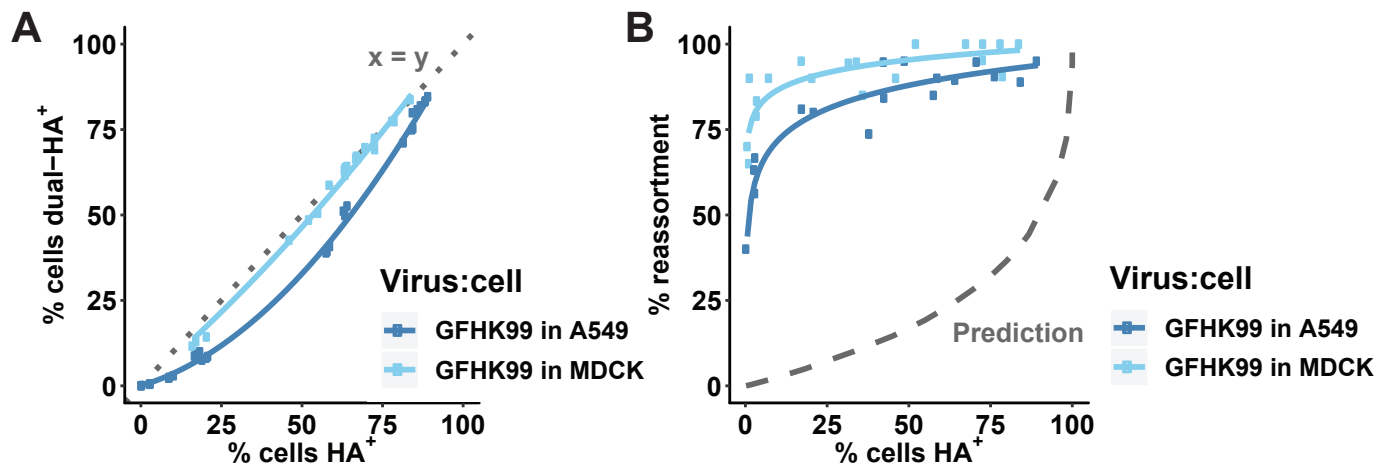

**Supplementary Figure 1 | Co-infection and reassortment of GFHK99 viruses in a human cell line.** Synchronized, single cycle co-infections were performed for a 1:1 mixture of GFHK99 virus in A549 cells. A) HA expression and B) reassortment was measured as described in Figure 1.

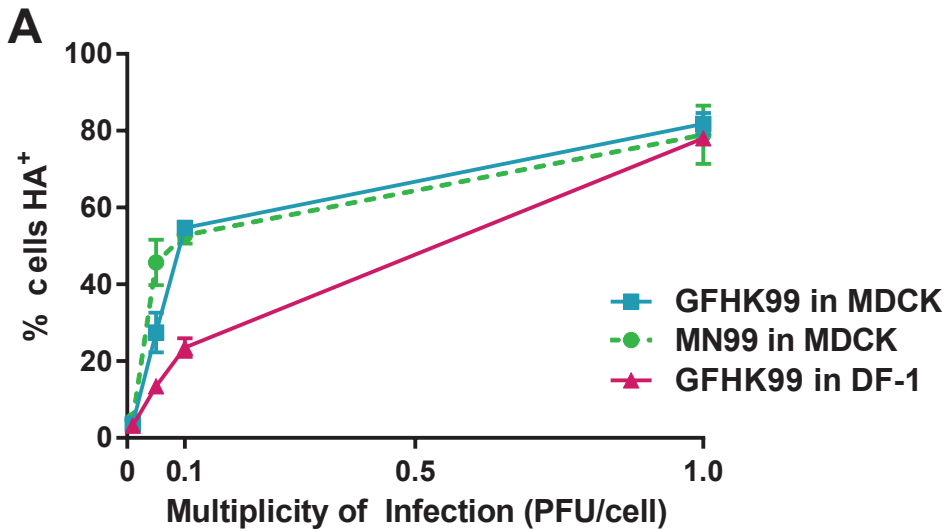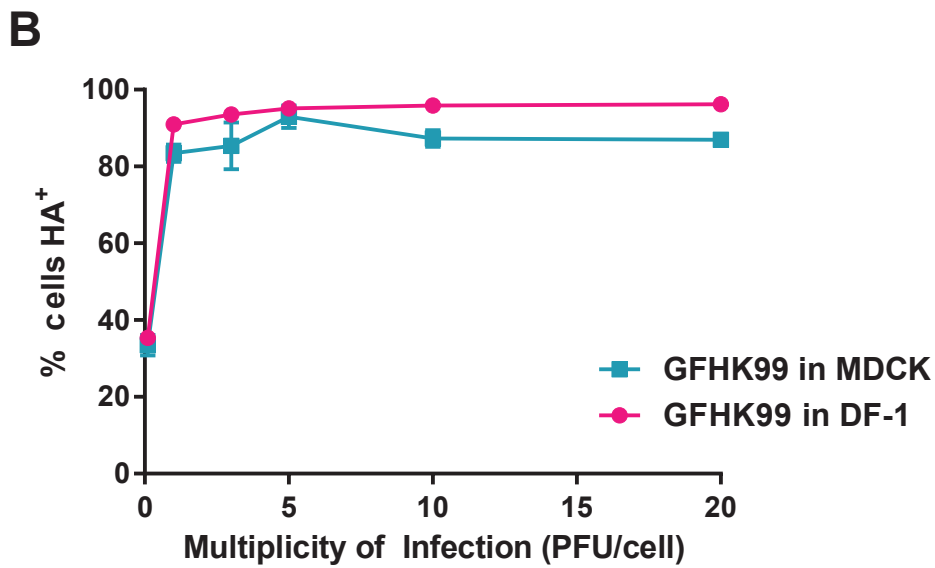

Example HA<sup>+</sup> flow gates:

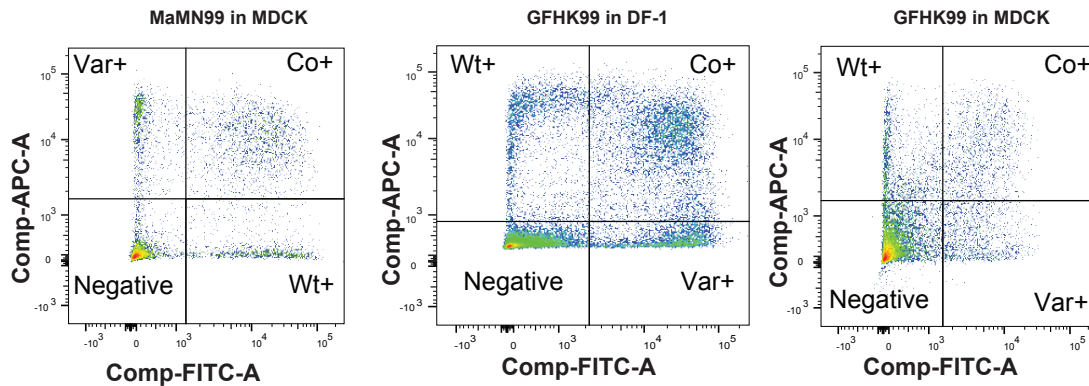

**Supplementary Figure 2 | Flow cytometry of HA expression represents infection level across MOIs for single cycle growth assays.** Triplicate or duplicate wells of cells were harvested 24 h post infection and stained to detect surface expression of HA and HIS epitope tags. Panel A) corresponds to Figure 2 A-C and Panel B) corresponds to Figure 2 D-E. Flow gating was performed by excluding cell debris and multiplet cells. Quadrant gates were used to quantify each population.

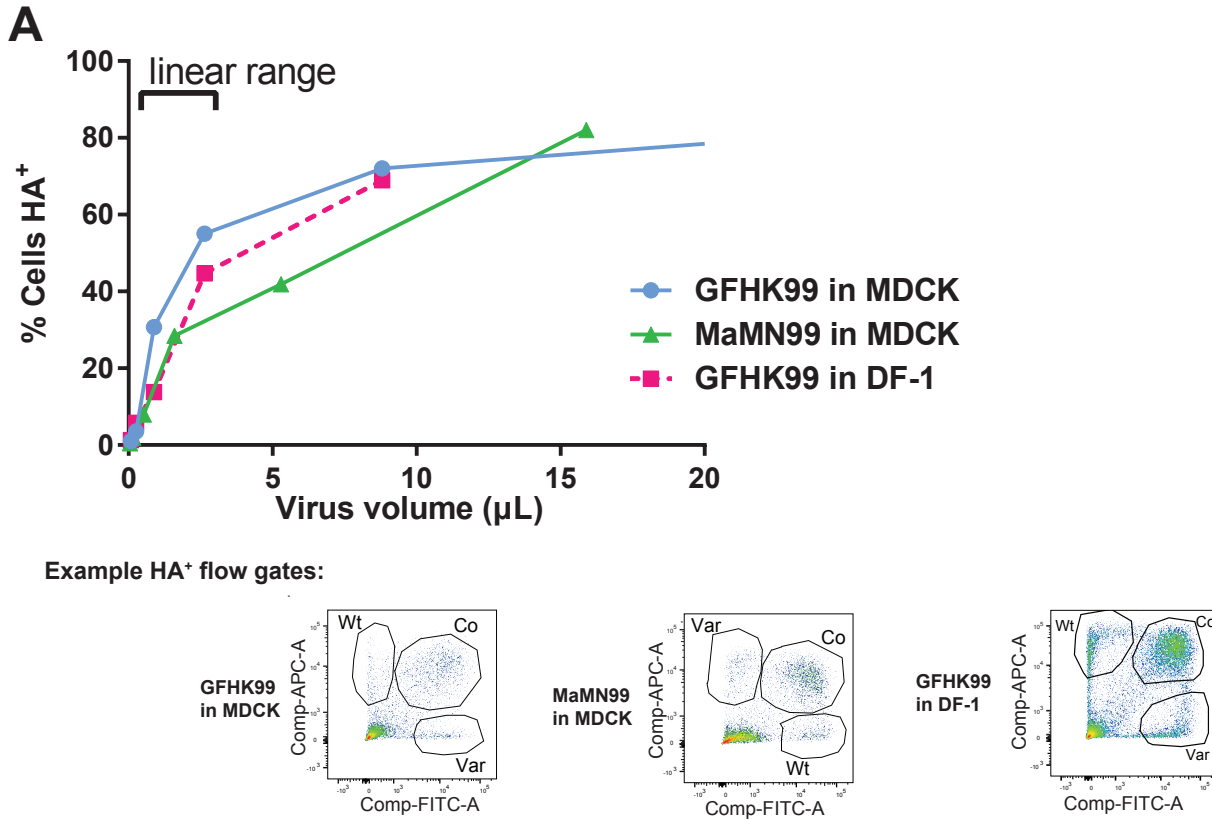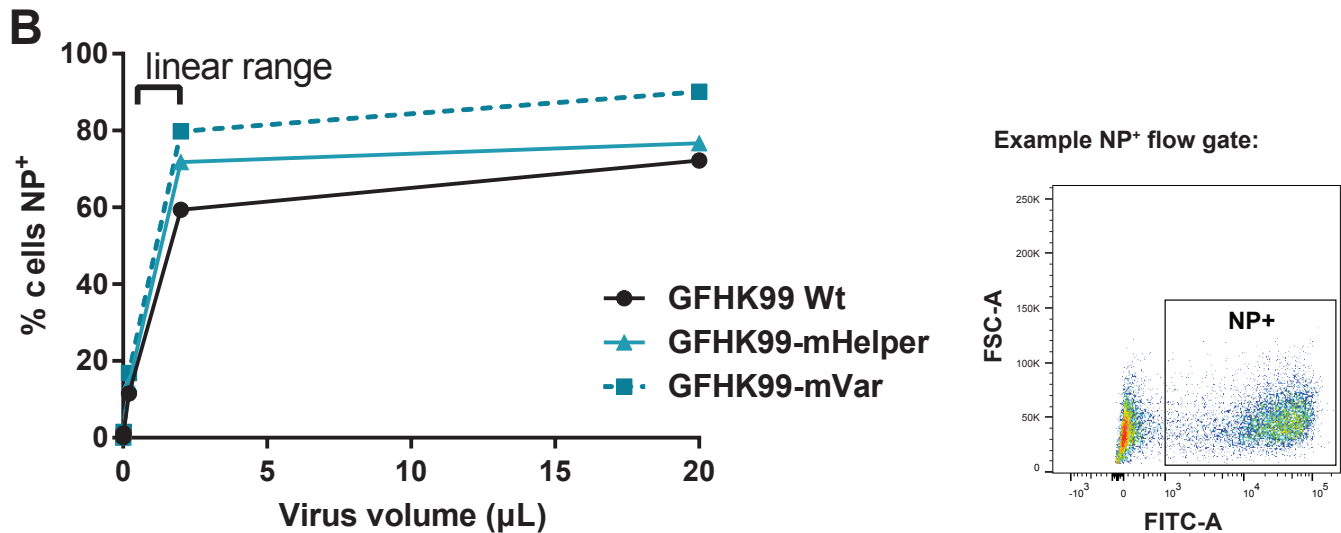

**Supplementary Figure 3 | Titration of virus stocks for HA expressing units and NP expressing units by flow cytometry.** A) The doses to be used in RNA kinetics studies shown in Figure 6 were determined via flow titration of HA expressing units in relevant cell lines. GFHK99 and MaMN99 virus mixtures were titrated in MDCK and DF-1 cell lines to calculate HA expressing units/mL in each virus-cell line combination. Serial dilutions of virus were used to infect cells under synchronized, single cycle conditions. Cells were harvested at 24 h post infection and stained for epitope tags. Data points of percent cells positive within the linear range were used to calculate the viral titer. B) GFHK99 viruses used in mRNA sequencing experiments were titered in DF-1 cells. Previous experiments indicated DF-1 cells were more permissive to infection and thus should give a more sensitive measurement of virus present. As the virus strains used did not contain epitope tags, virus detection was accomplished through cell permeabilization and detection of the viral NP protein. Data points within the linear range were used to calculate viral titers. Examples of flow cytometry gates show selection of HA epitope tag or internal NP expressing singlets following gating to exclude cell debris and doublets.

**Table 1. Genotypes of viruses used in this study.**

|                                    | <b>PB2</b>                                        | <b>PB1</b>                                        | <b>PA</b>                                         | <b>HA</b>                                         | <b>NP</b>                                         | <b>NA</b>                                         | <b>M</b>                                          | <b>NS</b>                                         |
|------------------------------------|---------------------------------------------------|---------------------------------------------------|---------------------------------------------------|---------------------------------------------------|---------------------------------------------------|---------------------------------------------------|---------------------------------------------------|---------------------------------------------------|
| <b>MaMN99<br/>Var</b>              | G399A                                             | G573A                                             | G402A                                             | A344G                                             | A414G                                             | G548A                                             | A433G                                             | A458G                                             |
| <b>GFHK99<br/>Var<sub>1</sub></b>  | A285G                                             | A420G                                             | A426G                                             | T341C                                             | T327C                                             | T295C                                             | A349G                                             | T329C                                             |
| <b>GFHK99<br/>Var<sub>2</sub></b>  | 300G,<br>303T,<br>306C,<br>459C,<br>461A,<br>467T | 282C,<br>285C,<br>288G,<br>420G,<br>426C,<br>432T | 351G,<br>354T,<br>357T,<br>501G,<br>504T,<br>507T | 338G,<br>351C,<br>344C,<br>432G,<br>435A,<br>438T | 345G,<br>351A,<br>354G,<br>485C,<br>488A,<br>494A | 424G,<br>430A,<br>433A,<br>583G,<br>586C,<br>589C | 340A,<br>343G,<br>349G,<br>439A,<br>442T,<br>445G | 386T,<br>389A,<br>392G,<br>479G,<br>482C,<br>488G |
| <b>GFHK99<br/>mVar<sub>1</sub></b> | A2151G,<br>C2164T                                 | A2193G,<br>A2185C                                 | C2064A,<br>A2061G                                 | T1574C,<br>G1589A                                 | G1442A,<br>T1411C                                 | C1315T,<br>G1300A                                 | A818C,<br>G815A                                   | A694C,<br>G690A                                   |
| <b>GFHK99<br/>mVar<sub>2</sub></b> | A2127G,<br>A2124G                                 | C2175T,<br>T2184C                                 | C2017T,<br>A2019G                                 | G1553A,<br>G1556A                                 | G1383A,<br>A1374G                                 | A1255C,<br>A1240C                                 | C809T,<br>T806C                                   | A681G,<br>C678T                                   |

**Table 2. Primers for the differentiation of Wt and Var<sub>1</sub> by HRM.**

| <b>MaMN99<sup>1</sup> Primers</b> |                         |
|-----------------------------------|-------------------------|
| MN99 PB2 337 F                    | CCGACAACAAGCACAGTTCA    |
| MN99 PB2 420 R                    | GCCAAAGGTCCCATGTTTTA    |
| MN99 PB1 522 F                    | CCTCAAGGACGTGATGGAAT    |
| MN99 PB1 622 R                    | CCATTTTCTTGGTCATGTTGTC  |
| MN99 PA 379 F                     | GAAATTGGAGTGACACGGAGA   |
| MN99 PA 461 R                     | TGAATGTGTGTCTTCTCGGATT  |
| MN99 HA 322 F                     | AAACCTGGGACCTTTATGTGG   |
| MN99 HA 402 R                     | TGAGCGATGCATAGTCTGGT    |
| MN99 NP 378 F                     | CGACAAAGAAGAGATCAGAAGGA |
| MN99 NP 457 R                     | TCATCAAATGGGTGAGACCA    |
| MN99 NA 522 F                     | TACCAGGCAAGGTTTGAAGC    |
| MN99 NA 605 R                     | GCCCGTTACTCCAATTGTCA    |
| MN99 M 404 F                      | TGCATGGGCCTCATATACAA    |
| MN99 M 493 R                      | ATCAGCAATCTGCTCACACG    |
| MN99 NS 389 F                     | GGCCATTATGGACAAGAGGA    |
| MN99 NS 483 R                     | CGTCTGTGAAAGCCCTCAGT    |
| <b>GFHK99<sup>2</sup> Primers</b> |                         |
| WF10 PB2 240 F                    | TGAGCAAGGCCAAACTCTTT    |
| WF10 PB2 320 R                    | CACGTTACAGCCAGAGGTGA    |
| WF10 PB1 362 F                    | TTGTCCAGCAAACGAGAGTG    |
| WF10 PB1 441 R                    | AGCCGGCTGGTTTCTATTC     |
| WF10 PA 386 F                     | GTGTGACACGGAGGGAAGTT    |
| WF10 PA 461 R                     | TGGATATGTGTTTTCTCGGATTT |
| WF10 HA 278 F                     | CCCTTCTTGTGACCTGCTGT    |
| WF10 HA 364 R                     | CCAGGGTAACACGTTCCATT    |
| WF10 NP 279 F                     | CCTAGAGGAACATCCCAGTGC   |
| WF10 NP 369 R                     | CAGCTCTCTCACCCATTTCC    |
| WF10 NA 270 F                     | ATTGGTCAAACCGCAATGT     |
| WF10 NA 346 R                     | GCCTGCAGAAAGCCTAATTG    |
| WF10 M 291 F                      | ACCCAACAACATGGACAGG     |
| WF10 M 373 R                      | TGCAACTTCCTTTGCTCCAT    |
| WF10 NS 265 F                     | CTATCGCTTCAATGCCTGCT    |
| WF10 NS 357 R                     | CTTTCTGCTTGGGAATGAGC    |

<sup>1</sup>A/mallard/Minnesota/199106/99 [H3N8], also referred to as “MN99”

<sup>2</sup>A/guinea fowl/Hong Kong/WF10/99 [H9N2], also referred to as “WF10”

**Table 3. Primers for the differentiation of Wt and Var<sub>2</sub> by PCR.**

| <b>GFHK99 WT Virus Primers</b>              |                          |
|---------------------------------------------|--------------------------|
| WF10wt PB2 286F                             | GACAGGGTAATGGTATCACCT    |
| WF10wt PB2 480R                             | GGCCAGGGTTCATGTCAACCCT   |
| WF10wt PB1 266F                             | GGTATGCACAAACAGATTGTGTAT |
| WF10wt PB1 440R                             | CCGGCTGGTTTCTATTCAAT     |
| WF10wt PA 337F                              | TCTTCCGGACCTATACGACTA    |
| WF10wt PA 521R                              | CTTCATCAAGGGTGTAGTCAG    |
| WF10wt NP 336F                              | GAAGGAGAGACGGGAAATG      |
| WF10wt NP 505R                              | GGCTCTTGTCTCTGGTATG      |
| WF10wt HA 323F                              | CGTCGAAAGATCATCAGCTGTA   |
| WF10wt HA 451R                              | CAGGTTGTGTCTGGGAAGATT    |
| WF10wt NA 413F                              | CTTGGGCAGGGAACCACTTTG    |
| WF10wt NA 601R                              | CCCAGTGACACAAACATGTAAC   |
| WF10wt M 328F                               | GAAGCTGAAGAGGGAAATGACA   |
| WF10wt M 457R                               | AAGAGCCACTTCTGTGGTC      |
| WF10wt NS 374F                              | CATTAGAGTGGACCAGGCA      |
| WF10wt NS 499R                              | CCCACTATTGCTCCTTCATCT    |
| <b>GFHK99 VAR<sub>2</sub> Virus Primers</b> |                          |
| WF10help PB2 286F                           | GACAGGGTAATGGTgTcTCCc    |
| WF10help PB2 480R                           | GGCCAGGGTTCATaTCAAcTcG   |
| WF10help PB1 266F                           | GGTATGCACAAACAGAcTGcGTgT |
| WF10help PB1 440R                           | CCGGCTGaTTTCTgTTCAAc     |
| WF10help M 331F                             | GCTGAAGAGAGAGATGACG      |
| WF10help M 459R                             | CAAGAGCCACTTCCGTAGTTA    |
| WF10help NS 373F                            | GCATTAGAGTGGATCAAGCG     |
| WF10help NS 496R                            | ACTATTGCCCTTCGTCC        |

**Table 4. Primers for identification of strand specific RNA species.**

| <b>MaMN99 Reverse Transcription and PCR Primers</b> |                                                      |
|-----------------------------------------------------|------------------------------------------------------|
| MN99 NS 552F                                        | GGCCGTCATGGTGGCGAAT AATGCAATTGGAATCCTCAT             |
| MN99 NS mRNAtag_dTR 13                              | CCAGATCGTTCGAGTCGT TTT TTT TTT TTT TTT AGTACTAAATAAG |
| MN99 NS cRNAtag_dTR 25                              | GCTAGCTTCAGCTAGGCATC AGTAGAAACAAGGGTGTTTTTTAG        |
| MN99 NS 795F                                        | CTTGCAGGCATTGCAAC                                    |
| MN99 NS 643R                                        | CGGACTCCCCAAGCGAATCTC                                |
| <b>GFHK99 Reverse Transcription and PCR Primers</b> |                                                      |
| WF10 vRNA NS 520F                                   | GGCCGTCATGGTGGCGAAT CCCTTCCAGGACATACTGAC             |
| WF10 NS mRNAtag_dTR 13                              | CCAGATCGTTCGAGTCGTTTTTTTTTTTTTTTTTATCATTAAATAAG      |
| WF10 NS cRNAtag_dTR 25                              | GCTAGCTTCAGCTAGGCATC AGTAGAAACAAGGGTGTTTTTTATC       |
| WF10 NS 592R                                        | TCATTCCATTCAAGTCCTCCGATGAG                           |
| WF10 NS 791F                                        | CCTTTATGCAAGCCTTACAAC                                |
| <b>MaMN99 and GFHK99 Tagged PCR Primers</b>         |                                                      |
| vRNA                                                | GGCCGTCATGGTGGCGAAT                                  |
| cRNA                                                | GCTAGCTTCAGCTAGGCATC                                 |
| mRNA                                                | CCAGATCGTTCGAGTCGT                                   |
